1 **Title:**

2

3 **Maternal and fetal genetic effects on birth weight and their relevance to cardio-metabolic**  
4 **risk factors**

5

6

7 **Authors and affiliations:**

8 Nicole M Warrington<sup>1,a</sup>, Robin N Beaumont<sup>2,a</sup>, Momoko Horikoshi<sup>3,4,5,a</sup>, Felix R Day<sup>6,a</sup>, Øyvind  
9 Helgeland<sup>7,8,9,a</sup>, Charles Laurin<sup>10,11</sup>, Jonas Bacelis<sup>12</sup>, Shouneng Peng<sup>13,14</sup>, Ke Hao<sup>13,14</sup>, Bjarke  
10 Feenstra<sup>15</sup>, Andrew R Wood<sup>2</sup>, Anubha Mahajan<sup>3,4</sup>, Jessica Tyrrell<sup>2,16</sup>, Neil R Robertson<sup>3,4</sup>, N  
11 William Rayner<sup>3,4,17</sup>, Zhen Qiao<sup>1</sup>, Gunn-Helen Øiseth Moen<sup>18,19</sup>, Marc Vaudel<sup>8</sup>, Carmen J  
12 Marsit<sup>20</sup>, Jia Chen<sup>21</sup>, Michael Nodzenski<sup>22</sup>, Theresia M Schnurr<sup>23</sup>, Mohammad H  
13 Zafarmand<sup>24,25</sup>, Jonathan P Bradfield<sup>26,27</sup>, Niels Grarup<sup>23</sup>, Marjolein N Kooijman<sup>28,29,30</sup>,  
14 Ruifang Li-Gao<sup>31</sup>, Frank Geller<sup>15</sup>, Tarunveer S Ahluwalia<sup>23,32,33</sup>, Lavinia Paternoster<sup>10</sup>, Rico  
15 Rueedi<sup>34,35</sup>, Ville Huikari<sup>36</sup>, Jouke-Jan Hottenga<sup>37,38,39</sup>, Leo-Pekka Lyytikäinen<sup>40</sup>, Alana  
16 Cavadino<sup>41,42</sup>, Sarah Metrustry<sup>43</sup>, Diana L Cousminer<sup>44,45</sup>, Ying Wu<sup>46</sup>, Elisabeth Thiering<sup>47,48</sup>,  
17 Carol A Wang<sup>49</sup>, Christian T Have<sup>23</sup>, Natalia Vilor-Tejedor<sup>50,51</sup>, Peter K Joshi<sup>52</sup>, Jodie N  
18 Painter<sup>53</sup>, Ioanna Ntalla<sup>54</sup>, Ronny Myhre<sup>55</sup>, Niina Pitkänen<sup>56</sup>, Elisabeth M van Leeuwen<sup>29</sup>,  
19 Raimo Joro<sup>57</sup>, Vasiliki Lagou<sup>3,58,59</sup>, Rebecca C Richmond<sup>10,11</sup>, Ana Espinosa<sup>60,61,62,63</sup>, Sheila J  
20 Barton<sup>64</sup>, Hazel M Inskip<sup>64,65</sup>, John W Holloway<sup>66</sup>, Loreto Santa-Marina<sup>60,67,68</sup>, Xavier  
21 Estivill<sup>69,70</sup>, Wei Ang<sup>71</sup>, Julie A Marsh<sup>71</sup>, Christoph Reichetzeder<sup>72,73</sup>, Letizia Marullo<sup>74</sup>,  
22 Berthold Hofer<sup>72,75</sup>, Kathryn L Lunetta<sup>76,77</sup>, Joanne M Murabito<sup>77,78</sup>, Caroline L Relton<sup>10,11,79</sup>,  
23 Manolis Kogevinas<sup>60,61,62,63</sup>, Leda Chatzi<sup>80</sup>, Catherine Allard<sup>81</sup>, Luigi Bouchard<sup>81,82,83</sup>, Marie-  
24 France Hivert<sup>84,85,86</sup>, Ge Zhang<sup>87,88,89</sup>, Louis J Muglia<sup>87,88,89</sup>, Jani Heikkinen<sup>90</sup>, Early Growth  
25 Genetics (EGG) Consortium<sup>b</sup>, Camilla S Morgen<sup>91</sup>, Antoine HC van Kampen<sup>92,93</sup>, Barbera DC  
26 van Schaik<sup>92</sup>, Frank D Mentch<sup>26</sup>, Claudia Langenberg<sup>6</sup>, Jian'an Luan<sup>6</sup>, Robert A Scott<sup>6</sup>, Jing  
27 Hua Zhao<sup>6</sup>, Gibran Hemani<sup>10,11</sup>, Susan M Ring<sup>10,11</sup>, Amanda J Bennett<sup>4</sup>, Kyle J Gaulton<sup>3,94</sup>,  
28 Juan Fernandez-Tajes<sup>3</sup>, Natalie R van Zuydam<sup>3,4</sup>, Carolina Medina-Gomez<sup>28,29,95</sup>, Hugoline G  
29 de Haan<sup>31</sup>, Frits R Rosendaal<sup>31</sup>, Zoltán Kutalik<sup>34,96</sup>, Pedro Marques-Vidal<sup>97</sup>, Shikta Das<sup>42</sup>,  
30 Gonneke Willemsen<sup>37,38,39</sup>, Hamdi Mbarek<sup>37,38,39,98</sup>, Martina Müller-Nurasyid<sup>99,100,101</sup>, Marie  
31 Standl<sup>47</sup>, Emil V R Appel<sup>23</sup>, Cilius E Fonvig<sup>23,102,103</sup>, Caecilie Trier<sup>23,102</sup>, Catharina EM van  
32 Beijsterveldt<sup>38</sup>, Mario Murcia<sup>60,104</sup>, Mariona Bustamante<sup>60,61,62</sup>, Sílvia Bonas-Guarch<sup>105</sup>, David  
33 M Hougaard<sup>106</sup>, Josep M Mercader<sup>105,107,108</sup>, Allan Linneberg<sup>109,110</sup>, Katharina E Schraut<sup>52</sup>,  
34 Penelope A Lind<sup>53</sup>, Sarah E Medland<sup>53</sup>, Beverley M Shields<sup>111</sup>, Bridget A Knight<sup>111</sup>, Jin-Fang  
35 Chai<sup>112</sup>, Kalliope Panoutsopoulou<sup>17</sup>, Meike Bartels<sup>37,38,39</sup>, Friman Sánchez<sup>105,113</sup>, Jacob  
36 Stockholm<sup>32</sup>, David Torrents<sup>105,114</sup>, Rebecca K Vinding<sup>32</sup>, Sara M Willems<sup>29</sup>, Mustafa Atalay<sup>57</sup>,  
37 Bo L Chawes<sup>32</sup>, Peter Kovacs<sup>115</sup>, Inga Prokopenko<sup>3,116</sup>, Marcus A Tuke<sup>2</sup>, Hanieh  
38 Yaghootkar<sup>117</sup>, Katherine S Ruth<sup>2</sup>, Samuel E Jones<sup>2</sup>, Po-Ru Loh<sup>118,119</sup>, Anna Murray<sup>2</sup>, Michael  
39 N Weedon<sup>2</sup>, Anke Tönjes<sup>120</sup>, Michael Stumvoll<sup>115,120</sup>, Kim F Michaelsen<sup>121</sup>, Aino-Maija  
40 Eloranta<sup>57</sup>, Timo A Lakka<sup>57,122,123</sup>, Cornelia M van Duijn<sup>29</sup>, Wieland Kiess<sup>124</sup>, Antje  
41 Körner<sup>115,124</sup>, Harri Niinikoski<sup>125,126</sup>, Katja Pahkala<sup>56,127</sup>, Olli T Raitakari<sup>56,128</sup>, Bo Jacobsson<sup>7,12</sup>,  
42 Eleftheria Zeggini<sup>17</sup>, George V Dedoussis<sup>129</sup>, Yik-Ying Teo<sup>112,130,131</sup>, Seang-Mei Saw<sup>112,132</sup>,  
43 Grant W Montgomery<sup>53</sup>, Harry Campbell<sup>52</sup>, James F Wilson<sup>52,133</sup>, Tanja GM Vrijkotte<sup>24</sup>,  
44 Martine Vrijheid<sup>60,61,62</sup>, Eco JCN de Geus<sup>37,38,39</sup>, M Geoffrey Hayes<sup>134</sup>, Haja N Kadarmideen<sup>135</sup>,  
45 Jens-Christian Holm<sup>23,102</sup>, Lawrence J Beilin<sup>136</sup>, Craig E Pennell<sup>49</sup>, Joachim Heinrich<sup>47,137</sup>, Linda  
46 S Adair<sup>138</sup>, Judith B Borja<sup>139,140</sup>, Karen L Mohlke<sup>46</sup>, Johan G Eriksson<sup>141,142,143</sup>, Elisabeth E  
47 Widén<sup>90</sup>, Andrew T Hattersley<sup>2,111</sup>, Tim D Spector<sup>43</sup>, Mika Kähönen<sup>144</sup>, Jorma S Viikari<sup>145,146</sup>,

48 Terho Lehtimäki<sup>40</sup>, Dorret I Boomsma<sup>37,38,39,98</sup>, Sylvain Sebert<sup>36,147,148,149</sup>, Peter  
49 Vollenweider<sup>97</sup>, Thorkild IA Sørensen<sup>10,23,91</sup>, Hans Bisgaard<sup>32</sup>, Klaus Bønnelykke<sup>32</sup>, Jeffrey C  
50 Murray<sup>150</sup>, Mads Melbye<sup>15,151</sup>, Ellen A Nohr<sup>152</sup>, Dennis O Mook-Kanamori<sup>31,153</sup>, Fernando  
51 Rivadeneira<sup>28,29,95</sup>, Albert Hofman<sup>29</sup>, Janine F Felix<sup>28,29,30</sup>, Vincent WV Jaddoe<sup>28,29,30</sup>, Torben  
52 Hansen<sup>23</sup>, Charlotta Pisinger<sup>154</sup>, Allan A Vaag<sup>109,155</sup>, Oluf Pedersen<sup>23</sup>, André G  
53 Uitterlinden<sup>28,29,95</sup>, Marjo-Riitta Järvelin<sup>36,147,148,156,157</sup>, Christine Power<sup>42</sup>, Elina  
54 Hyppönen<sup>42,158,159</sup>, Denise M Scholtens<sup>22</sup>, William L Lowe Jr<sup>134</sup>, George Davey Smith<sup>10,11,160</sup>,  
55 Nicholas J Timpson<sup>10,11</sup>, Andrew P Morris<sup>3,161,162</sup>, Nicholas J Wareham<sup>6</sup>, Hakon  
56 Hakonarson<sup>26,44,163</sup>, Struan FA Grant<sup>26,44,45,163</sup>, Timothy M Frayling<sup>2</sup>, Debbie A Lawlor<sup>10,11,160</sup>,  
57 Pål R Njølstad<sup>8,9</sup>, Stefan Johansson<sup>8,164</sup>, Ken K Ong<sup>6,165,c</sup>, Mark I McCarthy<sup>3,4,166,c</sup>, John RB  
58 Perry<sup>6,c</sup>, David M Evans<sup>1,10,11,c,d</sup>, Rachel M Freathy<sup>2,10,c,d</sup>

- 59
- 60 1. University of Queensland Diamantina Institute, Translational Research Institute,  
61 Brisbane, Australia
  - 62 2. Institute of Biomedical and Clinical Science, University of Exeter Medical School,  
63 University of Exeter, Royal Devon and Exeter Hospital, Exeter, UK
  - 64 3. Wellcome Trust Centre for Human Genetics, University of Oxford, Oxford, UK
  - 65 4. Oxford Centre for Diabetes, Endocrinology and Metabolism, University of Oxford,  
66 Oxford, UK
  - 67 5. RIKEN, Centre for Integrative Medical Sciences, Laboratory for Endocrinology,  
68 Metabolism and Kidney diseases, Yokohama, Japan
  - 69 6. MRC Epidemiology Unit, University of Cambridge School of Clinical Medicine,  
70 Cambridge, UK
  - 71 7. Department of Genetics and Bioinformatics, Domain of Health Data and Digitalisation,  
72 Norwegian Institute of Public Health, Oslo, Norway
  - 73 8. KG Jebsen Center for Diabetes Research, Department of Clinical Science, University of  
74 Bergen, Bergen, Norway
  - 75 9. Department of Pediatrics, Haukeland University Hospital, Bergen, Norway
  - 76 10. Medical Research Council Integrative Epidemiology Unit at the University of Bristol,  
77 Bristol, UK
  - 78 11. Population Health Sciences, Bristol Medical School, University of Bristol, Bristol, UK
  - 79 12. Department of Obstetrics and Gynecology, Sahlgrenska Academy, University of  
80 Gothenburg, Gothenburg, Sweden
  - 81 13. Department of Genetics and Genomic Sciences, Icahn School of Medicine at Mount  
82 Sinai, New York, USA
  - 83 14. Icahn Institute of Genomics and Multiscale Biology, Icahn School of Medicine at Mount  
84 Sinai, New York, USA
  - 85 15. Department of Epidemiology Research, Statens Serum Institute, Copenhagen,  
86 Denmark
  - 87 16. European Centre for Environment and Human Health, University of Exeter, Truro, UK
  - 88 17. Wellcome Sanger Institute, Hinxton, Cambridgeshire, UK
  - 89 18. Department of Endocrinology, Morbid Obesity and Preventive Medicine, Oslo  
90 University Hospital, Oslo, Norway
  - 91 19. Institute of Clinical Medicine, Faculty of Medicine, University of Oslo, Oslo, Norway
  - 92 20. Environmental Health at Rollins School of Public Health, Emory University, Atlanta, USA
  - 93 21. Department of Environmental Medicine and Public Health, Icahn School of Medicine at  
94 Mount Sinai, New York, USA

- 95 22. Department of Preventive Medicine, Division of Biostatistics, Feinberg School of  
96 Medicine, Northwestern University, Chicago, USA
- 97 23. Novo Nordisk Foundation Center for Basic Metabolic Research, Section of Metabolic  
98 Genetics, Faculty of Health and Medical Sciences, University of Copenhagen,  
99 Copenhagen, Denmark
- 100 24. Department of Public Health, Amsterdam Public Health Research Institute, Academic  
101 Medical Center (AMC), University of Amsterdam, Amsterdam, the Netherlands
- 102 25. Department of Clinical Epidemiology and Biostatistics, Amsterdam Public Health  
103 Research Institute, Academic Medical Center (AMC), University of Amsterdam, the  
104 Netherlands
- 105 26. Center for Applied Genomics, The Children's Hospital of Philadelphia, Philadelphia, USA
- 106 27. Quantinuum Research LLC, San Diego, USA
- 107 28. The Generation R Study Group, Erasmus MC, University Medical Center Rotterdam,  
108 Rotterdam, the Netherlands
- 109 29. Department of Epidemiology, Erasmus MC, University Medical Center Rotterdam,  
110 Rotterdam, the Netherlands
- 111 30. Department of Pediatrics, Erasmus MC, University Medical Center Rotterdam,  
112 Rotterdam, the Netherlands
- 113 31. Department of Clinical Epidemiology, Leiden University Medical Center, Leiden, the  
114 Netherlands
- 115 32. COPSAC, Copenhagen Prospective Studies on Asthma in Childhood, Herlev and  
116 Gentofte Hospital, University of Copenhagen, Copenhagen, Denmark
- 117 33. Steno Diabetes Center, Gentofte, Denmark
- 118 34. Swiss Institute of Bioinformatics, Lausanne, Switzerland
- 119 35. Department of Computational Biology, University of Lausanne, Lausanne, Switzerland
- 120 36. Center for Life Course Health Research, Faculty of Medicine, University of Oulu, Oulu,  
121 Finland
- 122 37. Department of Biological Psychology, Vrije Universiteit Amsterdam, Amsterdam, the  
123 Netherlands
- 124 38. Netherlands Twin Register, Department of Biological Psychology, VU University,  
125 Amsterdam, the Netherlands
- 126 39. Amsterdam Public Health, Amsterdam, the Netherlands
- 127 40. Department of Clinical Chemistry, Fimlab Laboratories, and Finnish Cardiovascular  
128 Research Center - Tampere, Faculty of Medicine and Life Sciences, University of  
129 Tampere, Tampere, Finland
- 130 41. Section of Epidemiology & Biostatistics, School of Population Health, University of  
131 Auckland, Auckland, New Zealand
- 132 42. Population, Policy and Practice, UCL Great Ormond Street Institute of Child Health,  
133 University College London, London, UK
- 134 43. Department of Twin Research, King's College London, St. Thomas' Hospital, London, UK
- 135 44. Division of Human Genetics, The Children's Hospital of Philadelphia, Philadelphia, USA
- 136 45. Department of Genetics, Perelman School of Medicine, University of Pennsylvania,  
137 Philadelphia, USA
- 138 46. Department of Genetics, University of North Carolina, Chapel Hill, USA
- 139 47. Institute of Epidemiology, Helmholtz Zentrum München - German Research Center for  
140 Environmental Health, Neuherberg, Germany

- 141 48. Division of Metabolic and Nutritional Medicine, Dr. von Hauner Children's Hospital,  
142 University of Munich Medical Center, Munich, Germany
- 143 49. School of Medicine and Public Health, Faculty of Medicine and Health, The University  
144 of Newcastle, Callaghan, Australia
- 145 50. Center for Genomic Regulation (CRG), the Barcelona Institute of Science and  
146 Technology, Barcelona, Spain
- 147 51. Barcelonabeta Brain Research Center (BBRC), Pasqual Maragall Foundation, Barcelona,  
148 Spain
- 149 52. Usher Institute for Population Health Sciences and Informatics, University of  
150 Edinburgh, Edinburgh, UK
- 151 53. QIMR Berghofer Medical Research Institute, Locked Bag 2000, Royal Brisbane Hospital,  
152 Herston, Australia
- 153 54. William Harvey Research Institute, Barts and the London School of Medicine and  
154 Dentistry, Queen Mary University of London, London, UK
- 155 55. Department of Genes and Environment, Division of Epidemiology, Norwegian Institute  
156 of Public Health, Oslo, Norway
- 157 56. Research Centre of Applied and Preventive Cardiovascular Medicine, University of  
158 Turku, Turku, Finland
- 159 57. Institute of Biomedicine, Physiology, University of Eastern Finland, Kuopio, Finland
- 160 58. KU Leuven - University of Leuven, Department of Neuroscience, Leuven, Belgium
- 161 59. VIB Center for Brain and Disease Research, Leuven, Belgium
- 162 60. CIBER de Epidemiología y Salud Pública (CIBERESP), Madrid, Spain
- 163 61. ISGlobal, Barcelona Institute for Global Health, Barcelona, Spain
- 164 62. Universitat Pompeu Fabra (UPF), Barcelona, Spain
- 165 63. IMIM (Hospital del Mar Medical Research Institute), Barcelona, Spain
- 166 64. Medical Research Council Lifecourse Epidemiology Unit, University of Southampton,  
167 Southampton, UK
- 168 65. NIHR Southampton Biomedical Research Centre, University of Southampton and  
169 University Hospital Southampton NHS Foundation Trust, Southampton, UK
- 170 66. Human Development & Health, Faculty of Medicine, University of Southampton,  
171 Southampton, UK
- 172 67. Subdirección de Salud Pública y Adicciones de Gipuzkoa, Donostia/San Sebastián, Spain
- 173 68. Instituto de Investigación Sanitaria BIODONOSTIA, Donostia/San Sebastián, Spain
- 174 69. Sidra Medicine Research, Sidra Medicine, Doha, Qatar
- 175 70. Genomics Unit, Dexeus Woman's Health, Barcelona, Spain
- 176 71. Division of Obstetrics and Gynaecology, The University of Western Australia, Crawley,  
177 Australia
- 178 72. Institute of Nutritional Science, University of Potsdam, Nuthetal, Germany
- 179 73. Center for Cardiovascular Research, Charité - Universitätsmedizin Berlin, Berlin,  
180 Germany
- 181 74. Department of Life Sciences and Biotechnology, Genetic Section, University of Ferrara,  
182 Ferrara, Italy
- 183 75. The First Affiliated Hospital of Jinan University, Guangzhou, China
- 184 76. Boston University School of Public Health, Department of Biostatistics, Boston,  
185 Massachusetts, USA
- 186 77. Framingham Heart Study, Framingham, USA

- 187 78. Boston University School of Medicine Department of Medicine, Section of General  
188 Internal Medicine, Boston, USA
- 189 79. Institute of Genetic Medicine, Newcastle University, Newcastle upon Tyne, UK
- 190 80. Department of Preventive Medicine, Keck School of Medicine, University of Southern  
191 California, Los Angeles, USA
- 192 81. Centre de recherche du Centre Hospitalier Universitaire de Sherbrooke, Sherbrooke,  
193 Canada
- 194 82. ECOGENE-21 and Lipid Clinic, Chicoutimi Hospital, Saguenay, Canada
- 195 83. Department of Biochemistry, Université de Sherbrooke, Sherbrooke, Canada
- 196 84. Department of Population Medicine, Harvard Pilgrim Health Care Institute, Harvard  
197 Medical School, Boston, USA
- 198 85. Diabetes Center, Massachusetts General Hospital, Boston, USA
- 199 86. Department of Medicine, Université de Sherbrooke, Sherbrooke, Canada
- 200 87. Center for Prevention of Preterm Birth, Perinatal Institute, Cincinnati Children's  
201 Hospital Medical Center, Department of Pediatrics, University of Cincinnati College of  
202 Medicine, Cincinnati, USA
- 203 88. March of Dimes Prematurity Research Center Ohio Collaborative, Cincinnati, USA
- 204 89. Human Genetics Division, Cincinnati Children's Hospital Medical Center, Cincinnati,  
205 USA
- 206 90. Institute for Molecular Medicine, Finland (FIMM), University of Helsinki, Helsinki,  
207 Finland
- 208 91. Department of Public Health, Section of Epidemiology, Faculty of Health and Medical  
209 Sciences, University of Copenhagen, Copenhagen, Denmark
- 210 92. Bioinformatics Laboratory, Clinical Epidemiology, Biostatistics and Bioinformatics  
211 (KEBB), Amsterdam Public Health Research Institute, Academic Medical Center /  
212 University of Amsterdam, Amsterdam, the Netherlands
- 213 93. Biosystems Data Analysis, Swammerdam Institute for Life Sciences (SILS), University of  
214 Amsterdam, Amsterdam, the Netherlands
- 215 94. Department of Pediatrics, University of California San Diego, La Jolla, California, USA
- 216 95. Department of Internal Medicine, Erasmus MC, University Medical Center Rotterdam,  
217 Rotterdam, the Netherlands
- 218 96. Institute of Social and Preventive Medicine, Lausanne University Hospital (CHUV),  
219 Lausanne, Switzerland
- 220 97. Department of Medicine, Internal Medicine, Lausanne University Hospital (CHUV),  
221 Lausanne, Switzerland
- 222 98. Amsterdam Reproduction and Development, Amsterdam, the Netherlands
- 223 99. Institute of Genetic Epidemiology, Helmholtz Zentrum München - German Research  
224 Center for Environmental Health, Neuherberg, Germany
- 225 100. Department of Medicine I, Ludwig-Maximilians-Universität, Munich, Germany
- 226 101. DZHK (German Centre for Cardiovascular Research), partner site Munich Heart  
227 Alliance, Munich, Germany
- 228 102. The Children's Obesity Clinic, Department of Pediatrics, Copenhagen University  
229 Hospital Holbæk, Holbæk, Denmark
- 230 103. Hans Christian Andersen Children's Hospital, Odense University Hospital, Odense,  
231 Denmark
- 232 104. FISABIO–Universitat Jaume I–Universitat de València, Joint Research Unit of  
233 Epidemiology and Environmental Health, Valencia, Spain



- 234 105. Barcelona Supercomputing Center (BSC), Joint BSC-CRG-IRB Research Program in  
235 Computational Biology, Barcelona Supercomputing Center, Barcelona, Spain  
236 106. Danish Center for Neonatal Screening, Department for Congenital Disorders, Statens  
237 Serum Institut, Copenhagen, Denmark  
238 107. Programs in Metabolism and Medical & Population Genetics, Broad Institute of  
239 Harvard and MIT, Cambridge, USA  
240 108. Diabetes Unit and Center for Genomic Medicine, Massachusetts General Hospital,  
241 Boston,, USA  
242 109. Department of Clinical Medicine, Faculty of Health and Medical Sciences, Copenhagen  
243 University, Copenhagen, Denmark  
244 110. Center for Clinical Research and Prevention, Bispebjerg and Frederiksberg Hospital,  
245 The Capital Region, Frederiksberg, Denmark  
246 111. NIHR Exeter Clinical Research Facility, University of Exeter Medical School and Royal  
247 Devon and Exeter NHS Foundation Trust, Exeter, UK  
248 112. Saw Swee Hock School of Public Health, National University of Singapore, National  
249 University Health System, Singapore, Singapore  
250 113. Computer Sciences Department, Barcelona Supercomputing Center, Barcelona, Spain  
251 114. Institució Catalana de Recerca i Estudis Avançats (ICREA), Barcelona, Spain  
252 115. IFB Adiposity Diseases, University of Leipzig, Leipzig, Germany  
253 116. Section of Genomics of Common Disease, Department of Medicine, Imperial College  
254 London, London, UK  
255 117. Genetics of Complex Traits, University of Exeter Medical School, Royal Devon and  
256 Exeter Hospital, Exeter, UK  
257 118. Program in Medical and Population Genetics, Broad Institute of Harvard and MIT,  
258 Cambridge, USA  
259 119. Division of Genetics, Department of Medicine, Brigham and Women's Hospital and  
260 Harvard Medical School, Boston, USA  
261 120. Medical Department, University of Leipzig, Leipzig, Germany  
262 121. Department of Nutrition, Exercise and Sports, Faculty of Science, University of  
263 Copenhagen, Copenhagen, Denmark  
264 122. Department of Clinical Physiology and Nuclear Medicine, Kuopio University Hospital,  
265 Kuopio, Finland  
266 123. Kuopio Research Institute of Exercise Medicine, Kuopio, Finland  
267 124. Pediatric Research Center, Department of Women's & Child Health, University of  
268 Leipzig, Leipzig, Germany  
269 125. Department of Pediatrics, Turku University Hospital, Turku, Finland  
270 126. Department of Physiology, University of Turku, Turku, Finland  
271 127. Paavo Nurmi Centre, Sports and Exercise Medicine Unit, Department of Physical  
272 Activity and Health, Turku, Finland  
273 128. Department of Clinical Physiology and Nuclear Medicine, Turku University Hospital,  
274 Turku, Finland  
275 129. Department of Nutrition and Dietetics, School of Health Science and Education,  
276 Harokopio University, Athens, Greece  
277 130. Department of Statistics and Applied Probability, National University of Singapore,  
278 Singapore, Singapore  
279 131. Life Sciences Institute, National University of Singapore, Singapore, Singapore  
280 132. Singapore Eye Research Institute, Singapore, Singapore

- 281 133. MRC Human Genetics Unit, Institute of Genetics and Molecular Medicine, University of  
282 Edinburgh, Edinburgh, UK
- 283 134. Department of Medicine, Division of Endocrinology, Metabolism, and Molecular  
284 Medicine, Feinberg School of Medicine, Northwestern University, Chicago, USA
- 285 135. Quantitative and Systems Genomics Group, Department of Bio and Health Informatics,  
286 Technical University of Denmark, Kgs. Lyngby, Denmark
- 287 136. School of Medicine and Pharmacology, Royal Perth Hospital Unit, The University of  
288 Western Australia, Perth, Australia
- 289 137. Institute and Outpatient Clinic for Occupational, Social and Environmental Medicine,  
290 Inner City Clinic, University Hospital Munich, Ludwig Maximilian University of Munich,  
291 Munich, Germany
- 292 138. Department of Nutrition, University of North Carolina, Chapel Hill, USA
- 293 139. USC-Office of Population Studies Foundation, Inc., University of San Carlos, Cebu City,  
294 Philippines
- 295 140. Department of Nutrition and Dietetics, University of San Carlos, Cebu City, Philippines
- 296 141. National Institute for Health and Welfare, Helsinki, Finland
- 297 142. Department of General Practice and Primary Health Care, University of Helsinki and  
298 Helsinki University Hospital, Helsinki, Finland
- 299 143. Folkhälsan Research Center, Helsinki, Finland
- 300 144. Department of Clinical Physiology, Tampere University Hospital, and Finnish  
301 Cardiovascular Research Center - Tampere, Faculty of Medicine and Life Sciences,  
302 University of Tampere, Tampere, Finland
- 303 145. Division of Medicine, Turku University Hospital, Turku, Finland
- 304 146. Department of Medicine, University of Turku, Turku, Finland
- 305 147. Department of Epidemiology and Biostatistics, MRC-PHE Centre for Environment and  
306 Health, School of Public Health, Imperial College London, London, UK
- 307 148. Biocenter Oulu, University of Oulu, Oulu, Finland
- 308 149. Department of Genomics of Complex Diseases, Imperial College London, London, UK
- 309 150. Department of Pediatrics, University of Iowa, Iowa City, USA
- 310 151. Department of Medicine, Stanford School of Medicine, Stanford, USA
- 311 152. Research Unit for Gynaecology and Obstetrics, Institute of Clinical Research, University  
312 of Southern Denmark, Odense, Denmark
- 313 153. Department of Public Health and Primary Care, Leiden University Medical Center,  
314 Leiden, the Netherlands
- 315 154. Research Center for Prevention and Health Capital Region, Center for Sundhed,  
316 Rigshospitalet – Glostrup, Copenhagen University, Glostrup, Denmark
- 317 155. Cardiovascular and Metabolic Disease Translational Medicine Unit, Early Clinical  
318 Development, IMED Biotech Unit, AstraZeneca, Gothenburg, Sweden
- 319 156. Unit of Primary Health Care, Oulu University Hospital, Oulu, Finland
- 320 157. Department of Life Sciences, College of Health and Life Sciences, Brunel University  
321 London, Middlesex, UK
- 322 158. Australian Centre for Precision Health, University of South Australia Cancer Research  
323 Institute, Adelaide, Australia
- 324 159. South Australian Health and Medical Research Institute, Adelaide, Australia
- 325 160. Bristol NIHR Biomedical Research Centre, Bristol, UK
- 326 161. Department of Biostatistics, University of Liverpool, Liverpool, UK
- 327 162. Estonian Genome Center, University of Tartu, Tartu, Estonia

328 163. Department of Pediatrics, Perelman School of Medicine, University of Pennsylvania,  
329 Philadelphia, USA

330 164. Department of Medical Genetics, Haukeland University Hospital, Bergen, Norway

331 165. Department of Paediatrics, University of Cambridge, Cambridge, UK

332 166. Oxford National Institute for Health Research (NIHR) Biomedical Research Centre,  
333 Churchill Hospital, Oxford, UK

334

335 <sup>a</sup> These authors contributed equally to this work.

336 <sup>b</sup> A full list of the members is provided in the Supplementary Material.

337 <sup>c</sup> These authors jointly directed this work.

338 <sup>d</sup> Corresponding authors.

339



340 **Abstract:**

341

342 Birth weight (BW) variation is influenced by fetal and maternal genetic and non-genetic  
343 factors, and has been reproducibly associated with future cardio-metabolic health  
344 outcomes. These associations have been proposed to reflect the lifelong consequences of  
345 an adverse intrauterine environment. In earlier work, we demonstrated that much of the  
346 negative correlation between BW and adult cardio-metabolic traits could instead be  
347 attributable to shared genetic effects. However, that work and other previous studies did  
348 not systematically distinguish the direct effects of an individual's own genotype on BW and  
349 subsequent disease risk from indirect effects of their mother's correlated genotype,  
350 mediated by the intrauterine environment. Here, we describe expanded genome-wide  
351 association analyses of own BW (n=321,223) and offspring BW (n=230,069 mothers), which  
352 identified 278 independent association signals influencing BW (214 novel). We used  
353 structural equation modelling to decompose the contributions of direct fetal and indirect  
354 maternal genetic influences on BW, implicating fetal- and maternal-specific mechanisms.  
355 We used Mendelian randomization to explore the causal relationships between factors  
356 influencing BW through fetal or maternal routes, for example, glycemic traits and blood  
357 pressure. Direct fetal genotype effects dominate the shared genetic contribution to the  
358 association between lower BW and higher type 2 diabetes risk, whereas the relationship  
359 between lower BW and higher later blood pressure (BP) is driven by a combination of  
360 indirect maternal and direct fetal genetic effects: indirect effects of maternal BP-raising  
361 genotypes act to reduce offspring BW, but only direct fetal genotype effects (once  
362 inherited) increase the offspring's later BP. Instrumental variable analysis using maternal  
363 BW-lowering genotypes to proxy for an adverse intrauterine environment provided no  
364 evidence that it causally raises offspring BP. In successfully separating fetal from maternal  
365 genetic effects, this work represents an important advance in genetic studies of perinatal  
366 outcomes, and shows that the association between lower BW and higher adult BP is  
367 attributable to genetic effects, and not to intrauterine programming.

368 Birth weight (BW) is an important predictor of newborn and infant survival, a key indicator  
369 of pregnancy outcomes for mothers as well as for offspring, and is observationally  
370 associated with future risk of adult cardio-metabolic diseases in the offspring.

371  
372 Observational associations between lower BW and later cardio-metabolic diseases are often  
373 assumed to reflect adaptations made by a developing fetus in response to an adverse  
374 intrauterine environment, such as maternal malnutrition. This concept has been termed the  
375 Developmental Origins of Health and Disease (DOHaD) hypothesis<sup>1</sup>. Support of the DOHaD  
376 hypothesis is primarily from animal models (reviewed in <sup>2</sup>). Observational studies of famine-  
377 exposed populations support prenatal programming in relation to body size and diabetes,  
378 but not other cardio-metabolic health measures (reviewed in <sup>3</sup>). However, DOHaD cannot  
379 provide a complete explanation for the relationship between lower BW and increased risk of  
380 cardio-metabolic disease. Other likely contributing factors are (i) environmental  
381 confounding, leading to phenotypic associations across the life-course<sup>4</sup>, and (ii) shared  
382 genetic effects operating at the population level, as demonstrated in our recent work  
383 showing overlap between genetic variants influencing BW and adult cardio-metabolic  
384 diseases<sup>5</sup>. Genetic associations between BW and later cardio-metabolic diseases may arise  
385 from the direct effects of the same inherited genetic variants at different stages of the life-  
386 course<sup>6</sup>. However, consideration of an individual's own genotype in isolation cannot exclude  
387 potential confounding by any indirect effects of the correlated maternal genotype ( $r \approx 0.5$ ) on  
388 the intrauterine, and possibly postnatal, environment. Evidence for maternal indirect effects  
389 on BW and later offspring disease risk could indicate the role of the intrauterine  
390 environment in later-life disease etiology.

391  
392 To date, 65 genomic loci have been associated with BW in genome-wide association studies  
393 (GWAS), implicating biological pathways that may underlie observational associations with  
394 adult disease<sup>5,7-9</sup>. However, most of these studies did not distinguish between maternal and  
395 fetal genetic influences on BW. Evidence from monogenic human models<sup>10</sup> and variance  
396 components analyses<sup>11</sup> demonstrate that BW is influenced both by genotypes inherited by  
397 the fetus and by maternal genotypes that influence the intrauterine environment. To date,  
398 GWAS of own BW<sup>5</sup> and offspring BW<sup>7</sup>, which have focused on the fetal and maternal  
399 genome respectively, have produced overlapping signals due to the correlation between  
400 maternal and fetal genotypes. Identified BW variants might have (i) a direct fetal effect only,  
401 (ii) an indirect maternal effect only, or (iii) some combination of the two. Performing  
402 separate GWAS analyses of own or offspring BW precludes full resolution of the origin of  
403 the identified genetic effects. For example, some association signals identified in a GWAS of  
404 own BW may in fact be the exclusive consequence of strong indirect maternal effects (and  
405 vice versa).

406  
407 To address these issues, we performed greatly-expanded GWAS of own BW ( $n=321,223$ ) and  
408 offspring BW ( $n=230,069$  mothers) using data from the EGG Consortium and the UK Biobank  
409 (2017 release). We applied a statistical method that we recently developed, which utilises  
410 structural equation modelling (SEM), to partition genetic effects on BW into maternal and  
411 fetal components at genome-wide significant loci<sup>7,12</sup>. We then extended the method to  
412 estimate maternal- and fetal-specific genetic effects across the genome in a computationally  
413 efficient manner, and used the results for downstream analyses. Our ability to resolve  
414 maternal and fetal genetic contributions provides substantial insights into the underlying

415 biological regulation of BW and into the origins of observational relationships with type 2  
416 diabetes (T2D) and blood pressure (BP).

## 417 RESULTS

418

### 419 Meta-analyses of fetal and maternal GWAS

420 We conducted GWAS meta-analyses of own (fetal) genetic variants on own BW  
421 (**Supplementary Figure 1, Supplementary Tables 1 and 2**) and maternal genetic variants on  
422 offspring BW (**Supplementary Figure 2, Supplementary Tables 3 and 4**) in individuals of  
423 European ancestry. We then performed approximate conditional and joint multiple-SNP  
424 analysis (COJO<sup>13</sup>) and a trans-ethnic meta-analysis to identify further independent SNPs  
425 (**Methods**). The GWAS meta-analysis of own BW (N=321,223) identified 211 independent  
426 single nucleotide polymorphisms (SNPs) at genome-wide significance ( $P < 5 \times 10^{-8}$ )  
427 (**Supplementary Figures 3, 4, 5a, Supplementary Table 5, and Methods**). The GWAS meta-  
428 analysis of offspring BW (N=230,069 mothers) identified 105 independently associated SNPs  
429 ( $P < 5 \times 10^{-8}$ ; **Supplementary Figures 3, 4, 5b, Supplementary Table 5, and Methods**). When  
430 we applied a more stringent significance threshold that accounts for the large number of  
431 low frequency SNPs imputed in the UK Biobank and EGG studies ( $P < 6.6 \times 10^{-9}$ ; see Kemp et al.  
432 <sup>14</sup> for details of the derivation of this threshold), 147 of the 211 SNPs from the GWAS meta-  
433 analysis of own BW and 72 of the 105 SNPs from the GWAS meta-analysis of offspring BW  
434 remained significant (**Supplementary Table 5**).

435

436 SNPs at 52 genome-wide significant loci (within 500Kb) were identified in the GWAS of both  
437 own BW and offspring BW. Of these, 11 loci had the same lead SNP and a further 31 loci had  
438 fetal and maternal lead SNPs correlated with  $r^2 \geq 0.1$ . Colocalization analysis indicated 27/31  
439 of these maternal and fetal lead SNP pairs were likely tagging the same BW signal (posterior  
440 probability  $> 0.5$ ). Therefore, we identified a total of 278 independent association signals,  
441 represented by 305 SNPs (**Supplementary Figure 4 and Supplementary Table 5**). Of the 305  
442 genome-wide significant SNPs, 238 were novel representing 214 independent association  
443 signals, four of the identified SNPs are rare (minor allele frequency (MAF) $< 1\%$ ) and 21 are  
444 low-frequency ( $1\% \leq \text{MAF} < 5\%$ ). Three of the rare variants (*YKT6/GCK*, *ACVR1C* and *MIR146B*)  
445 alter BW by more than double the effect ( $> 100\text{g}$  per allele) of the first common variants  
446 identified<sup>9</sup>. In the independent Norwegian MoBa-HARVEST study (N=13,934 mother-  
447 offspring duos), the variance in BW explained by fetal genetic variation was larger than that  
448 explained either by maternal genetic variation or the covariance between the two. The fetal  
449 genotype at the genome-wide significant SNPs explained 7% of the variance in BW, whereas  
450 the maternal genotype explained 3% and the covariance explained -0.5% (in total, the  
451 genome-wide significant SNPs explained 9% of the variance in BW, calculated as the sum of  
452 variances explained by the fetal genotype, maternal genotype, plus twice the covariance).  
453 Maternal genome-wide complex trait analysis (M-GCTA<sup>11</sup>), which estimates SNP heritability  
454 and partitions this quantity into maternal and fetal components, estimated that a total of  
455 39.8% of the variance in BW could be explained by tagged fetal genetic variation (28.5%),  
456 tagged maternal genetic variation (7.6%) and twice the covariance between the two (3.7%).

457

458 We integrated data from several sources to highlight possible causal genes underlying the  
459 identified associations, including gene-level expression data across 43 tissues (from GTEx  
460 v6p<sup>15</sup>), placental expression quantitative trait loci (eQTL<sup>16</sup>), topologically associating  
461 domains (TADs) identified in human embryonic stem cells<sup>17,18</sup> and non-synonymous SNPs  
462 (see **Supplementary Table 5 and Methods**). Several genes were highlighted by multiple  
463 approaches; however, further functional studies are required to confirm causality.

## 464 **Structural equation model to estimate maternal and fetal effects**

465 We next partitioned the 305 genome-wide significant SNPs into five categories based on  
466 their maternal and/or fetal genetic contributions to BW. To achieve this, we used structural  
467 equation modelling (SEM) that accounts for the correlation between fetal and maternal  
468 genotypes and therefore potential confounding of the maternal and fetal effects on each  
469 other<sup>12</sup>. Briefly, the model uses the self-reported BW data from the individuals in the UK  
470 Biobank, along with the BW data of the first offspring of the UK Biobank women. We model  
471 both grand-maternal and offspring genotypes (which were absent in the UK Biobank) as  
472 latent factors, in addition to the genotype data of the UK Biobank individual  
473 (**Supplementary Figure 17**). The model is robust to missing data and measurement error, so  
474 we could include individuals from the UK Biobank who have reported either their own  
475 (including women and men) or their offspring's BW (women only), but not both. Likewise,  
476 we can also include summary statistics from the EGG consortium to improve the estimation  
477 of the maternal and fetal effects (see **Methods** for full details). The model provides  
478 unbiased estimates of the maternal and fetal genetic effects on BW. We analysed 257,734  
479 individuals of European descent from the UK Biobank (85,518 women with their own and  
480 their offspring's BW, 98,235 men or women with their own BW, and 73,981 women with  
481 only their offspring's BW) and incorporated the summary statistics from the EGG  
482 Consortium European meta-analysis of own BW (N=80,745) and offspring BW (N=19,861;  
483 **Figure 1, Supplementary Figures 4, 6 and Supplementary Table 5**). Using the confidence  
484 intervals around the SEM-adjusted maternal and fetal effect estimates, we identified 83  
485 SNPs with fetal-only effects, 45 SNPs with maternal-only effects, 36 SNPs with directionally-  
486 concordant fetal and maternal effects, and 24 SNPs with directionally-opposing fetal and  
487 maternal effects (**Supplementary Figure 7**). For example, rs10830963 at *MTNR1B* was  
488 identified in both the own BW ( $P=2.8 \times 10^{-11}$ ) and offspring BW ( $P=9.1 \times 10^{-39}$ ) GWAS, but the  
489 SEM analysis revealed that its effect on BW was exclusively maternal ( $P_{SEMfetal}=0.7$ ,  
490  $P_{SEMmaternal}=4.6 \times 10^{-19}$ ). Conversely, rs28457693 at *PTCH1/FANCC* (own BW GWAS:  $P=9.9 \times 10^{-26}$ ;  
491 offspring BW GWAS:  $P=3.7 \times 10^{-9}$ ) showed evidence of a fetal effect only ( $P_{SEMfetal}=1.7 \times 10^{-9}$ ,  
492  $P_{SEMmaternal}=0.2$ ). SNP rs560887 at *G6PC2* was identified only in the GWAS of offspring BW  
493 ( $P=1.2 \times 10^{-14}$ ), but was found to have directionally-opposing maternal and fetal effects on  
494 BW ( $P_{SEMfetal}=2.8 \times 10^{-8}$ ,  $P_{SEMmaternal}=5.4 \times 10^{-14}$ ). At present, these categories are suggestive as  
495 the current sample size has insufficient statistical power to detect small genetic effects,  
496 particularly maternal effects. There were 117 SNPs that were unclassified, and some of the  
497 SNPs that were classified as fetal only, for example, may have had a small maternal effect  
498 that was undetected with the current sample size. Asymptotic power calculations showed  
499 that with the current sample size we had 80% power to detect fetal (maternal) effects that  
500 explained 0.006% (0.008%) of the variance in BW ( $\alpha=0.05$ ). However, there was strong  
501 consistency with traditional conditional linear regression modelling in N=18,873 mother-  
502 offspring pairs (**Supplementary Table 6 and Methods**), and overall, the method gave a clear  
503 indication as to which genetic associations are driven by the maternal or fetal genomes,  
504 respectively.

505

506 To extend the estimates of adjusted maternal and fetal effects genome-wide, we developed  
507 a weighted linear model (WLM) that yields a good approximation to the SEM (see  
508 **Methods**), with equivalent estimates for the 305 genome-wide significant SNPs  
509 (**Supplementary Figure 8**). This was necessary because the SEM is too computationally  
510 intensive to fit to a large number of SNPs across the genome. The resulting adjusted fetal

511 and maternal genotype effect estimates on BW from the WLM are hereafter referred to as  
512 WLM-adjusted estimates. Using linkage disequilibrium (LD) score regression<sup>19</sup>, we observed  
513 that the genetic correlation between the WLM-adjusted maternal and fetal effects ( $r_g=0.10$ ,  
514  $P=0.12$ ) was substantially lower than that between the unadjusted effects from the original  
515 GWAS ( $r_g=0.82$ ,  $P<0.01$ ), indicating that the WLM largely accounts for the underlying  
516 correlation between fetal and maternal genotypes. No additional novel loci were identified  
517 in the WLM-adjusted analyses. We used these WLM-adjusted estimates in downstream  
518 analyses to identify fetal-specific and maternal-specific mechanisms that regulate BW and to  
519 investigate the genetic links between BW and adult traits.

520

### 521 **Maternal- and fetal-specific tissues and mechanisms underlying BW regulation**

522 Using the WLM-adjusted estimates, we observed differences in enrichment between the  
523 maternal and fetal profiles of gene expression across tissues, and of regulatory pathways.  
524 Tests of global enrichment of BW SNP associations across tissues sampled from the GTEx  
525 project<sup>15</sup> using LD-SEG<sup>20</sup>, indicated that the only tissues reaching significance after  
526 Bonferroni correction was enrichment for maternal-specific SNP associations for genes  
527 expressed in connective/bone tissues (**Supplementary Figure 9**). Integration of epigenetic  
528 signatures defined by the Roadmap Epigenomics project highlighted, after Bonferroni  
529 correction, a significant enrichment of maternal-specific effects in the ovary for histone  
530 modification marks (H3K4me1) and regions of open chromatin (**Supplementary Table 7**); no  
531 significant enrichment was detected for other signatures. Gene-set enrichment analysis  
532 using WLM-adjusted effect estimates also implicated different gene sets having fetal-  
533 specific influences on BW (**Supplementary Table 8**) to those having maternal-specific  
534 influences (**Supplementary Table 9**).

535 A major determinant of BW is the duration of gestation. We performed LD score regression  
536 analysis<sup>19</sup> to investigate the genetic correlation between published maternal genotype  
537 effects on gestational duration<sup>21</sup> and the WLM-adjusted BW effects. (To date, there is no  
538 published GWAS of fetal genotype and gestational duration.) We found a substantial genetic  
539 correlation with the WLM-adjusted maternal effects on offspring BW ( $r_g=0.63$ ;  $P=2.1\times 10^{-5}$ ;  
540 **Supplementary Table 10**; see **Methods**), but not with the WLM-adjusted fetal effects on  
541 own BW ( $r_g=-0.10$ ,  $P=0.35$ ). Gestational duration was unavailable for >85% of individuals in  
542 the GWAS analyses, due to the large UK Biobank sample without gestational duration, so it  
543 is possible that some identified association signals influence BW primarily by altering the  
544 timing of delivery. We looked up the 305 genome-wide significant BW-associated SNPs in  
545 the published maternal GWAS of gestational duration<sup>21</sup> (**Supplementary Table 11**) and  
546 followed up 6 SNPs in 13,206 mother-child pairs ( $P<1.6\times 10^{-4}$  with gestational duration,  
547 corrected for 305 tests, **Methods**). Meta-analyzing the results from the mother-child pairs  
548 with summary data from 23andMe<sup>21</sup> strengthened associations with gestational duration at  
549 four of the six loci (*EBF1*, *AGTR2*, *ZBTB38* and *KCNAB1*; **Supplementary Table 12**). The  
550 precise causal relationship between fetal growth and gestational duration at these loci  
551 requires further investigation, however, the majority of associations with BW do not appear  
552 to be driven by associations with gestational duration.

553

554

555

### 556 **Maternal- and fetal-specific genetic correlations between BW and adult traits**



557 The 305 genome-wide significant BW-associated SNPs were collectively associated with a  
558 wide variety of other phenotypes in previously-published GWAS and in the UK Biobank  
559 (**Supplementary Table 13**; see **Methods**). At the genome-wide level, we previously reported  
560 genetic correlations between own BW and several adult cardio-metabolic disease traits<sup>5</sup>, for  
561 example systolic blood pressure (SBP;  $r_g = -0.22$ ,  $P = 5.5 \times 10^{-13}$ ), but at that time were unable to  
562 distinguish the direct fetal genotype contribution from the indirect contribution of maternal  
563 genotype. To understand these distinct contributions, we calculated genetic correlations  
564 using LD score regression<sup>19</sup> between WLM-adjusted fetal and maternal SNP effect estimates  
565 and GWAS estimates for a large range of health-related traits (**Figure 2, Supplementary**  
566 **Table 10** and **Methods**). For many traits, for example adult height, the WLM-adjusted fetal  
567 effect on own BW ( $r_g = 0.28$ ,  $P = 8.1 \times 10^{-16}$ ) showed a similar genetic correlation to the WLM-  
568 adjusted maternal effect on offspring BW ( $r_g = 0.29$ ,  $P = 5.1 \times 10^{-16}$ ). However, for others, we  
569 observed differing fetal-specific and maternal-specific genetic correlations. For example, for  
570 several glycemetic traits (T2D, 2-hour glucose, fasting glucose, fasting insulin), there were  
571 directionally-opposite fetal (own BW) and maternal (offspring BW) genetic correlations.  
572 Moreover, the genetic correlations with glycemetic traits that were estimated using the WLM-  
573 adjusted effects were substantially larger than those estimated using the unadjusted  
574 effects, demonstrating the importance of accounting for the maternal-fetal genotype  
575 correlation (e.g. fasting glucose: WLM-adjusted fetal effect on own BW  $r_g = -0.25$ ,  $P = 8.2 \times 10^{-6}$ ;  
576 unadjusted fetal effect on own BW  $r_g = -0.11$ ,  $P = 0.005$ ; WLM-adjusted maternal effect on  
577 offspring BW  $r_g = 0.20$ ,  $P = 0.003$ ; unadjusted maternal effect on offspring BW  $r_g = 0.08$ ,  $P = 0.09$ ).  
578 Cardiovascular traits showed directionally consistent WLM-adjusted maternal and WLM-  
579 adjusted fetal genetic correlations, but with different strengths. For example, the genetic  
580 correlation between SBP and WLM-adjusted maternal effects on offspring BW ( $r_g = -0.23$ ,  
581  $P = 9.2 \times 10^{-10}$ ) was stronger than that between SBP and WLM-adjusted fetal effects on own  
582 BW ( $r_g = -0.14$ ,  $P = 9.8 \times 10^{-5}$ ).

583

#### 584 **Using genetics to estimate causal effects of intrauterine exposures on birth weight**

585 The separation of direct fetal genotype effects from indirect maternal genotype effects on  
586 BW offers the novel opportunity to estimate the unconfounded causal influences of  
587 intrauterine exposures using Mendelian randomization (MR) analyses. The principle of MR is  
588 similar to that of a randomized controlled trial: parental alleles are randomly transmitted to  
589 offspring and are therefore generally free from confounding<sup>22,23</sup>. Consequently, an  
590 association between a maternal genetic variant for an exposure of interest, and offspring  
591 BW, after accounting for fetal genotype, provides evidence that the maternal exposure is  
592 causally related to offspring BW (**Figure 3A**). Previous attempts to estimate causal effects of  
593 maternal exposures on offspring BW were limited by an inability to adjust for fetal genotype  
594 in adequately-powered samples<sup>24</sup>. However, this limitation can now be overcome by using  
595 WLM-adjusted estimates in a two-sample setting. We applied two-sample MR<sup>25</sup> to estimate  
596 causal effects of maternal exposures on offspring BW, focusing on height, glycemetic traits  
597 and SBP. We selected SNPs known to be associated with each exposure, and regressed the  
598 WLM-adjusted maternal effect sizes on BW for those SNPs against the effect estimates for  
599 the maternal exposure, weighting by the inverse of the variance of the maternal exposure  
600 effect estimates. In the same way, we used the WLM-adjusted fetal effects to estimate the  
601 casual effect of the offspring's genetic potential on their own BW, and compared the results  
602 with the estimated maternal causal effects.

603

## 604 **Height and birth weight**

605 We used the WLM-adjusted estimates to investigate the relationship between maternal  
606 height and offspring BW. Classical animal experiments<sup>26</sup> have demonstrated that larger  
607 maternal size can support greater fetal growth. This is supported by observational human  
608 data showing that offspring height shifts from being closer to maternal than paternal height  
609 percentile in infancy towards mid-parental height in adulthood, the latter reflecting the  
610 predominant role of inherited genetic variation<sup>27</sup>. However several observational studies  
611 have provided mixed evidence regarding correlations between maternal or paternal height  
612 and offspring BW: some studies show a stronger correlation with maternal than paternal  
613 height<sup>28,29</sup>, which would be consistent with a role for intrauterine effects (since both parents  
614 contribute equally to offspring genotype), while others show that maternal height is as  
615 strongly correlated with offspring BW as paternal height<sup>30-32</sup>. The MR analysis, using 693  
616 height-associated SNPs as the instrumental variable<sup>33</sup> (**Supplementary Table 14**), estimated  
617 that a 1 SD (6cm) higher maternal height is causally associated with a 0.11 SD (95%CI: 0.10,  
618 0.13) higher offspring BW (**Figure 3B**), independent of the direct fetal effects. This estimate  
619 was similar in magnitude to that obtained using the WLM-adjusted fetal effects on own BW  
620 (0.11 SD (95%CI: 0.09, 0.13)), which reflects the role of inherited height alleles  
621 (**Supplementary Table 15**). Both a previous study<sup>34</sup> and complementary analysis using  
622 transmitted and non-transmitted alleles in mother-offspring pairs (comparison of effects of  
623 maternal non-transmitted height alleles with alleles transmitted to offspring in N=3,485 and  
624 4,962 mother-offspring pairs, respectively) estimated a much larger contribution of direct  
625 fetal effects than indirect maternal effects to offspring BW (**Supplementary Table 16**),  
626 however the sample sizes in both analyses were relatively small. To test whether the  
627 maternal height effect might be influencing BW by increasing gestational duration, as  
628 previously reported<sup>34</sup>, we applied the same MR analysis to maternal genotype effects on  
629 gestational duration<sup>21</sup>, but found little supportive evidence (P=0.12; **Supplementary Table**  
630 **15**). The MR results from the current study are consistent with the hypothesis that greater  
631 maternal height causally increases BW, and that this effect is independent of the direct BW-  
632 raising effect of height alleles inherited by the fetus. For the maternal effect, we cannot rule  
633 out causal pathways other than the greater availability of space for fetal growth: causal  
634 associations between greater height and more favourable socio-economic position<sup>35</sup>, for  
635 example, could enhance maternal nutritional status and result in higher offspring BW. We  
636 also cannot exclude the contribution of assortative mating<sup>36</sup> to these results: correlation  
637 between maternal and paternal height genotypes could lead to similar maternal and fetal  
638 MR estimates.

639

## 640 **Glycemic traits and birth weight**

641 We used the WLM-adjusted estimates to assess the causal effect of maternal fasting glucose  
642 levels on BW with precision that was not achievable previously<sup>24</sup> due to the inability to  
643 adjust for direct fetal effects in a large sample. Maternal glucose is a key determinant of  
644 fetal growth: it crosses the placenta, stimulating the production of fetal insulin which  
645 promotes growth<sup>37</sup>, and as a consequence, strong, positive associations are seen between  
646 maternal fasting glucose, or fetal insulin levels, and offspring BW<sup>38</sup>. In a randomized clinical  
647 trial of women with gestational diabetes mellitus, glucose control was shown to reduce  
648 offspring BW<sup>39</sup>. Therefore, we anticipated detecting a positive causal effect of maternal  
649 glucose on offspring BW. Indeed, the MR analysis using 33 fasting glucose-associated SNPs  
650 (**Supplementary Table 14**), estimated an 0.18 SD (95%CI: 0.13, 0.23) higher offspring BW

651 due to 1 SD (0.4mmol/L) higher maternal fasting glucose, independent of the direct fetal  
652 effects (**Supplementary Table 15; Figure 3C**). A large part of the genetic variation underlying  
653 fasting glucose levels is implicated in pancreatic beta cell function and thus overlaps with  
654 the genetics of insulin secretion. To estimate the causal effect of insulin secretion on BW,  
655 we used 18 SNPs as instrumental variables that are associated with disposition index (DI),  
656 which is a measure of insulin response to glucose, adjusted for insulin sensitivity. Low values  
657 of DI are associated with higher T2D risk. Alleles that increase insulin secretion in the  
658 mother tend to decrease her glucose levels, which consequently reduces insulin-mediated  
659 growth of the fetus. This was reflected in the negative causal estimate from the MR analysis  
660 of the effect of maternal DI on offspring BW (-0.17 SD per 1 SD higher maternal DI (95%CI: -  
661 0.26, -0.08); **Supplementary Table 15**). In contrast, we estimated that BW was 0.10 SD  
662 (95%CI: 0.02, 0.19) higher per 1 SD genetically higher fetal DI (**Methods**), highlighting that  
663 genetic variation underlying insulin secretion plays a key role in fetal growth, and suggesting  
664 that the genetic effects on DI are similar in fetal and adult life.

665  
666 BW associations with previously-reported GWAS SNPs for fasting glucose, T2D, insulin  
667 secretion and insulin sensitivity loci were directionally consistent with the overall genetic  
668 correlations and supported the opposing contributions of fetal versus maternal glucose-  
669 raising alleles on BW (**Supplementary Figures 10-13**). Taken together with the WLM-  
670 adjusted genetic correlations, the MR results underline the importance of fetal insulin in  
671 fetal growth and demonstrate that fetal genetic effects link lower BW with reduced insulin  
672 secretion and higher T2D risk in later life<sup>6</sup>. However, further work will be needed to  
673 investigate the role of maternal indirect genetic effects in the relationship between high BW  
674 and higher future risk of T2D. The latter relationship may be driven by (i) maternal genetic  
675 predisposition to T2D resulting in raised glycemia in pregnancy and high offspring BW, then  
676 later offspring T2D through inheritance of maternal risk alleles, or (ii) a programming effect  
677 of exposure to high maternal glucose on later offspring T2D risk, or (iii) a combination of the  
678 two. The proportion of the negative BW-T2D covariance explained by fetal genotype effects  
679 on own BW was estimated to be 36% (95%CI: 15, 57; **Supplementary Table 17**), though this  
680 is likely an underestimate since current methods cannot adjust for the opposing effects of  
681 maternal genotypes.

### 682 683 **Blood pressure and birth weight**

684 Observational studies of the relationship between BW and later life BP have produced  
685 mixed findings: some studies indicate that lower BW is associated with higher later-life BP  
686 and related comorbidities<sup>40</sup>, whereas others have shown that this relationship could be  
687 driven by a statistical artifact due to adjusting for current weight<sup>41,42</sup>. We previously showed  
688 that genetic factors account for a large proportion of an association between lower BW and  
689 higher BP<sup>5</sup>, but it was not clear whether this was due to direct fetal genotype effects, or  
690 indirect maternal effects, or a combination of the two. We explored this contested  
691 association further using several complementary analyses. The estimate of the BW-SBP  
692 covariance explained was higher when using the maternal genotyped SNP associations with  
693 offspring BW (65% (95%CI: 57, 74%)), than when using the fetal genotype associations with  
694 own BW (56% (95%CI: 48, 64%); **Supplementary Table 17**). A similar pattern was seen with  
695 the BW-DBP covariance (72% (95%CI: 58, 85%) explained using the maternal genotyped SNP  
696 associations with offspring BW and 56% (95%CI: 46, 67%) explained using the fetal genotype  
697 associations on own BW; **Supplementary Table 17**). Together with the larger maternal than

698 fetal genetic correlations (**Figure 2**), these results point to the predominant importance of  
699 indirect maternal effects of BP genetics on offspring BW (**Supplementary Figures 14 and**  
700 **15**). In line with this, MR analyses indicated that a 1SD (10mmHg) higher maternal SBP is  
701 causally associated with a 0.15 SD (95%CI: -0.19, -0.11) lower offspring BW, independent of  
702 the direct fetal effects. In contrast, there was no fetal effect of SBP on their own BW, after  
703 adjusting for the indirect maternal effect (-0.01 SD per 10mmHg, 95% CI: -0.05, 0.03;  
704 **Supplementary Tables 14 and 15; Figure 3D**). Similar results were seen in the WLM-  
705 adjusted MR analyses of DBP on both offspring and own BW.

706

#### 707 **Estimating the causal effect of BW-lowering intrauterine exposures on offspring SBP**

708 Having established (i) substantial negative genetic covariance between BW and SBP and (ii)  
709 indirect causal effects of maternal SBP-raising genotypes on lower offspring BW, a key  
710 question is whether maternal SNPs that reduce offspring BW through intrauterine effects  
711 are also associated with higher SBP in their adult offspring. Such an association would  
712 suggest that the maternal intrauterine effects also cause the later BP effect (i.e. possibly  
713 through developmental adaptations) (**Figure 4A; Supplementary Figure 16**). To investigate  
714 this possibility, we tested the conditional association between maternal and offspring  
715 genetic scores for BW and offspring SBP as measured in 3,886 mother-offspring pairs in the  
716 UK Biobank, with sensitivity analyses in 1,749 father-offspring pairs. The fetal genetic score  
717 for lower BW was associated with higher offspring SBP, even after adjustment for maternal  
718 (or paternal) BW genetic score. However, when adjusted for fetal genotypes, the maternal  
719 allele score for lower BW was associated with lower (*not higher*) offspring SBP  
720 (**Supplementary Table 18**). Taken together, our results demonstrate that the observed  
721 negative correlation between BW and later SBP is driven by (i) the causal effect of higher  
722 maternal SBP on lower offspring BW (**Figure 3D**), in combination with (ii) the subsequent  
723 transmission of SBP-associated alleles to offspring, which then increase offspring SBP  
724 (**Figure 4B**), rather than by long-term developmental compensations to adverse *in utero*  
725 conditions.

726

## 727 DISCUSSION

728

729 In greatly-expanded GWAS and follow-up analyses of own and offspring BW, we have  
730 identified 214 novel association signals and have partitioned the genetic effects on BW into  
731 direct fetal and indirect maternal (intrauterine) effects, both for genome-wide significant  
732 SNPs, and for SNPs across the genome. Further analyses using these partitioned effects  
733 indicated both fetal-specific and maternal-specific mechanisms and tissues involved in the  
734 regulation of BW, and also mechanisms with directionally-opposing effects in the fetus and  
735 mother (e.g. insulin secretion, fasting glucose).

736

737 The variety of phenotypes associated with the identified BW SNPs, and pathways  
738 highlighted, illustrate that fetal growth is the result of many different processes<sup>43</sup>. We used  
739 the knowledge that subsets of BW-associated SNPs influence BP while others influence  
740 glycemic traits, or height, together with the WLM-adjusted estimates of maternal and fetal  
741 effects on BW to achieve a deeper level of insight into the relationships between BW and  
742 these adult traits. MR analyses using the WLM-adjusted estimates showed (i) evidence that  
743 both direct fetal and indirect maternal effects of height-raising genotypes contribute to  
744 higher offspring BW, (ii) that fetal, and not maternal, genotype effects explain the negative  
745 genetic correlation between BW and later T2D, and (iii) that the negative genetic correlation  
746 between BW and adult SBP is the result of both indirect SBP-raising effects of maternal  
747 genotypes reducing offspring BW, and direct effects of fetal genotypes on higher adult SBP.  
748 The resolution of maternal vs. fetal effects was higher in these MR analyses than has  
749 previously been achieved using analyses of available mother-child pairs<sup>44</sup>, due to greater  
750 statistical power. Recently, a number of studies have attempted to use MR methodology to  
751 investigate causal links between BW and later T2D<sup>45-47</sup>. However, such naïve MR analyses  
752 using two-sample approaches in unrelated sets of individuals, which do not properly  
753 account for the correlation between maternal and fetal genotype effects, may result in  
754 erroneous conclusions regarding causality. Future investigations into causal links between  
755 BW and later T2D or other disease outcomes will require larger samples than are currently  
756 available, that have maternal and offspring genotypes in addition to offspring later-life  
757 disease outcomes.

758

759 There are some limitations to this study. Although we were able to fit the full SEM at the  
760 305 genome-wide significant SNPs, we were unable to fit the SEM at all SNPs across the  
761 genome. We have shown previously how a two degree of freedom test based on this SEM  
762 (i.e. where maternal and fetal paths are constrained to zero) can have greater power to  
763 detect associated loci, particularly when maternal and fetal genetic effects on the  
764 phenotype are similar in magnitude (including situations where the effects operate in  
765 opposite directions). However, we are currently unable to fit the SEM nor conduct an  
766 equivalent test in a computationally feasible manner across the genome. If such a test were  
767 developed, it would provide greater power than the current one degree of freedom tests  
768 used in the WLM-adjusted analyses, particularly for SNPs where maternal and fetal genetic  
769 effects operate in opposite directions, and could therefore be used for locus detection in  
770 future analyses. Additionally, there are a number of limitations relating to the MR analyses.  
771 First, the MR results concern BW variation within the normal range and do not necessarily  
772 reflect the effects of extreme environmental events (e.g. famine), which may exert  
773 qualitatively different effects and produce long-term developmental compensations in



774 addition to low BW. Additionally, we have assumed a linear relationship between BW and  
775 later life traits, which is an oversimplification, particularly for T2D: higher BW is associated  
776 with later T2D risk, in addition to lower BW, particularly in populations with a high  
777 prevalence of T2D. MR is not well placed to examine the effects of extreme events, or non-  
778 linear relationships, and alternative methodology will be necessary to investigate life-course  
779 associations in this context. Second, BW is the end marker of a developmental process, with  
780 critical periods during the process that may make the fetus particularly sensitive to  
781 environmental influences. The MR analyses could therefore be masking effects at certain  
782 critical periods. We would need to look at maternal exposures on intrauterine growth  
783 trajectories or the specific function of the genetic variants on BW to interrogate this further.  
784 Third, we have assumed that genetic variants identified in large GWAS of SBP and glycemic  
785 traits in males and non-pregnant females are similarly associated in pregnant women. This  
786 assumption is reasonable, given that genetic associations are generally similar in pregnant  
787 vs non-pregnant women, though there is some indication that genetic effects on SBP are  
788 weaker in pregnancy (see Table 2, eTable 5 and eTable 6f in Tyrrell et al. <sup>24</sup>). Fourth, we have  
789 not investigated the potential gender difference in the associations between BW and later  
790 life traits. There is evidence that the association between BW and both T2D<sup>48</sup> and SBP<sup>49</sup> is  
791 stronger in females than males. However, to perform the MR analyses, we would require  
792 male and female-specific effect sizes for each of the exposures, which are currently not  
793 available. Finally, we have assumed that the critical period of exposure to maternal indirect  
794 genetic effects is pregnancy, and that the estimates do not reflect pre-pregnancy effects on  
795 primordial oocytes or post-natal effects<sup>44</sup>. However, since we have used BW-associated  
796 SNPs, the maternal effects are most-likely mediated *in utero*. While we cannot rule out  
797 postnatal effects<sup>50</sup>, our analysis of offspring SBP associations with BW-associated SNPs in  
798 father-child pairs showed different associations compared with mother-child pairs, implying  
799 postnatal effects were unlikely.

800

801 To conclude, the systematic separation of fetal from maternal genetic effects in a well-  
802 powered study has enhanced our understanding of the regulation of BW and of its links with  
803 later cardiometabolic health. In particular, we show that the association between lower BW  
804 and higher adult BP is attributable to genetic effects, and not to intrauterine programming.  
805 In successfully separating fetal from maternal genetic effects and using them in Mendelian  
806 randomization analyses, this work sets a precedent for future studies seeking to understand  
807 the causal role of the intrauterine environment in later-life health.



## 808 **ONLINE METHODS**

809

### 810 **Ethics statement**

811 All human research was approved by the relevant institutional review boards and conducted  
812 according to the Declaration of Helsinki. The UK Biobank has approval from the North West  
813 Multi-Centre Research Ethics Committee (MREC), which covers the UK. Participants of all  
814 studies provided written informed consent. Ethical approval for the ALSPAC study was  
815 obtained by the ALSPAC Ethics and Law Committee and the local Research Ethics  
816 Committees.

817

### 818 **Statistical tests**

819 Details of statistical tests used in the various analyses are reported under the appropriate  
820 headings below. All tests were two-sided, unless otherwise stated.

821

### 822 **UK Biobank phenotype preparation**

823 The UK Biobank is a study of 502,655 participants<sup>51</sup>. A total of 280,315 participants reported  
824 their own birth weight (BW) in kilograms at either the baseline visit or at least one of the  
825 follow-up visits. Participants reporting being part of a multiple birth were excluded from our  
826 analyses (N=7,706). For participants reporting BW at more than one visit (N=11,214), the  
827 mean value of the reported BWs was used, and if the mean difference between any 2 time  
828 points was >1kg, the participant was excluded (N=74). Data on gestational duration were  
829 not available; however, in order to exclude likely pre-term births, participants with BW  
830 values <2.5kg or >4.5kg were excluded (N=36,330). The remaining BW values were Z-score  
831 transformed separately in males and females for analysis.

832 Female participants were also asked to report the BW of their first child. A total of 216,839  
833 women reported the BW of their first child on at least one assessment center visit. Values  
834 were recorded to the nearest whole pound, and were converted to kilograms for our  
835 analyses. Where women reported the BW of the first child at multiple time points  
836 (N=11,353) these were averaged and women were excluded if the mean difference between  
837 any 2 offspring BW measurements was >1kg (N=31). Women who reported the BW of their  
838 first child <2.2kg or >4.6kg were excluded (N=6,333). BW of first child was regressed against  
839 age at first birth and assessment center location. Residuals from the regression model were  
840 converted to Z-scores for analysis (sex of the first child was not available, so we were unable  
841 to calculate sex-specific Z-scores).

842

### 843 **UK Biobank ethnicity classification and genome-wide association analysis**

844 We analysed data from the May 2017 release of imputed genetic data from the UK Biobank,  
845 a resource extensively described elsewhere<sup>51</sup>. Given the reported technical error with non-  
846 HRC imputed variants, we focused exclusively on the set of ~40M imputed variants from the  
847 HRC reference panel.

848 In addition to the quality control metrics performed centrally by the UK Biobank, we defined  
849 a subset of “white European” ancestry samples. To do this, we generated ancestry  
850 informative principal components (PCs) in the 1000 genomes samples. The UK Biobank  
851 samples were then projected into this PC space using the SNP loadings obtained from the  
852 principal components analysis using the 1000 genomes samples. The UK Biobank  
853 participants’ ancestry was classified using K-means clustering centered on the 3 main 1000  
854 genomes populations (European, African, South Asian). Those clustering with the European

855 cluster were classified as having European ancestry. The UK Biobank participants were  
856 asked to report their ethnic background. Only those reporting as either “British”, “Irish”,  
857 “White” or “Any other white background” were included in the clustering analysis. In total,  
858 217,397 participants with a valid measure of their own BW and 190,406 women with a valid  
859 measure of BW of first child were classified as European and included in analyses. For trans-  
860 ethnic analyses all participants with valid phenotypes were included regardless of ancestry  
861 (N=227,530 participants with a valid measure of their own BW and N=210,208 with a valid  
862 measure of the BW of their first child).

863 Association analysis was conducted using a linear mixed model implemented in BOLT-LMM  
864 v2.3<sup>52</sup> to account for population structure and relatedness. Only autosomal genetic variants  
865 which were common (MAF>1%), passed QC in all 106 batches and were present on both  
866 genotyping arrays were included in the genetic relationship matrix (GRM). For the genome-  
867 wide association study (GWAS) of the participants’ own BW, genotyping array and year of  
868 birth were included as covariates in all models. For the GWAS of the BW of the first child,  
869 genotyping array and genotyping release (interim vs. full) were included as covariates in the  
870 regression model, and indels, regions of long range LD (as defined in <sup>51</sup>) and SNPs with  
871 Hardy-Weinberg equilibrium P-values<1x10<sup>-6</sup> were excluded from the GRM.

872

### 873 **GWAS of own birth weight**

874 ***European ancestry meta-analysis of own birth weight:*** The European ancestry GWAS meta-  
875 analysis of own BW consisted of two components: (i) 80,745 individuals from 35 studies  
876 participating in the EGG Consortium from Europe, USA and Australia; and (ii) 217,397  
877 individuals of white European origin from the UK Biobank. Studies from the EGG Consortium  
878 conducted genome-wide association analysis of own BW that was Z-score transformed  
879 separately in males and females, and adjusted for study-specific covariates, including  
880 gestational duration, where available (**Supplementary Table 1**). GWASs were imputed up to  
881 the 1000 Genomes<sup>53</sup> (1000G) reference panel. We combined the sex-specific BW association  
882 summary statistics across the EGG studies in a fixed-effects meta-analysis, implemented in  
883 GWAMA<sup>54</sup>, and subsequently combined the resulting summary statistics with the UK  
884 Biobank summary statistics using a second fixed-effects meta-analysis (max N=297,142).  
885 Variants failing GWAS quality control filters, reported in less than 50% of the total sample  
886 size in the EGG component, or with MAF<0.1%, were excluded from the European ancestry  
887 meta-analysis. We also performed a fixed-effects meta-analysis of the association summary  
888 statistics for 16,095 directly genotyped SNPs on the X-chromosome from the UK Biobank  
889 and the meta-analysis of the EGG studies (max N=270,929) using GWAMA<sup>54</sup>. A locus was  
890 defined as a gap of ≥500kb between any genome-wide significant SNPs, and the lead SNP  
891 within each locus was the SNP with the smallest P-value. The set of lead SNPs from each  
892 locus will be referred to as our genome-wide significant SNPs.

893 We were concerned that self-reported BW as adults in the UK Biobank would not be  
894 comparable with that obtained from more stringent collection methods used in the EGG  
895 studies. We conducted a heterogeneity test using Cochran’s Q statistic<sup>55</sup>, as implemented in  
896 GWAMA<sup>54</sup>, to assess the difference in allelic effects between the European EGG meta-  
897 analysis and the European subset of the UK Biobank, and we were unable to detect  
898 evidence of heterogeneity at lead SNPs after Bonferroni correction (all P>0.00029;

899 **Supplementary Table 5**). However, we acknowledge that the power to detect evidence for  
900 heterogeneity using the Cochran’s Q statistic when comparing two groups is low and we use  
901 it here to highlight any SNPs with large differences in allelic effects. Although none of the

902 SNPs reached the Bonferroni corrected threshold, there was an enrichment for low P, with  
903 more than double the expected number of SNPs with  $P < 0.05$  (18/173; **Supplementary Table**  
904 **5**). In addition, the UK Biobank lacked information on gestational duration, which could  
905 impact the strength of association compared to the results obtained from the EGG studies  
906 which adjusted for gestational duration. Therefore, we conducted a further sensitivity  
907 analysis to specifically assess the impact of adjustment for gestational duration testing for  
908 heterogeneity in allelic effects at lead SNPs between EGG studies which adjusted for  
909 gestational duration (N=43,964) and the European subset of the UK Biobank. The only locus  
910 where the lead SNP showed significant heterogeneity, after Bonferroni correction, was  
911 rs1482852 at the *LOC339894/CCNL1* signal ( $P_{het}=0.00015$ ), which was a locus showing the  
912 strongest association with own BW and genome-wide significant in both EGG and the UK  
913 Biobank components independently.

914 There is potential for individuals to be in both the UK Biobank and EGG studies (i.e. the  
915 same individual in both the UK Biobank and a study within EGG) and this might lead to false  
916 positive association signals. We performed a bivariate linkage-disequilibrium (LD) score  
917 regression<sup>19</sup> analysis using the European UK Biobank GWAS and European EGG meta-  
918 analysis summary statistics of own BW, and observed a regression intercept of 0.0266  
919 (0.0077), indicating that the equivalent of approximately 3,524 individuals were in both  
920 GWAS analyses.

921 Univariate LD score regression<sup>56</sup> of the European ancestry meta-analysis of own BW  
922 estimated the genomic inflation as 1.08, indicating that the majority of genome-wide  
923 inflation of the test statistics was due to polygenicity. To assess the impact of this inflation  
924 on the European ancestry meta-analysis, we re-calculated the association P-values after  
925 adjusting the test statistics for the LD score regression intercept. On the basis of this  
926 adjusted analysis, the lead SNP at 22 loci (out of 173) no longer reached genome-wide  
927 significance (**Supplementary Table 5**).

928

929 **Approximate conditional and joint multiple-SNP (COJO) analysis to identify additional**  
930 **independent signals for own birth weight:** Approximate COJO analysis<sup>13</sup> was performed in  
931 GCTA<sup>57</sup> using the European ancestry meta-analysis summary statistics to identify  
932 independent association signals attaining genome-wide significance ( $P < 5 \times 10^{-8}$ ). The LD  
933 reference panel was made up of 344,246 unrelated UK Biobank participants defined by the  
934 UK Biobank as having British ancestry and SNPs were restricted to those present in the HRC  
935 reference panel. At each locus, only SNPs labelled by GCTA as “independent” and not in LD  
936 with the original lead SNP ( $R^2 < 0.05$ ) were listed as secondary SNPs.

937

938 **Trans-ethnic meta-analysis of own birth weight:** To identify any further independent BW-  
939 associated SNPs, we conducted a trans-ethnic meta-analysis combining three components:  
940 (i) 80,745 individuals from the European ancestry component within EGG; (ii) 12,948  
941 individuals from nine studies within EGG from diverse ancestry groups: African American,  
942 Afro-Caribbean, Mexican, Chinese, Thai, Filipino, Surinamese, Turkish and Moroccan; and  
943 (iii) 227,530 individuals of all ancestries from the UK Biobank. The same strategy and variant  
944 filtering criteria were applied as in the European meta-analysis of own BW (**Supplementary**  
945 **Figure 1**). None of the lead SNPs showed evidence of heterogeneity in BW allelic effects  
946 across the three components after Bonferroni correction (all Cochran’s  $Q$   $P > 0.169$ ;  
947 **Supplementary Table 5**). Univariate LD score regression<sup>56</sup> of the trans-ethnic meta-analysis  
948 estimated the genomic inflation as 1.08. After adjustment of the test statistics for the LD

949 score regression intercept, the lead SNP at 8 loci (out of 11 that were added to our genome-  
950 wide significant loci from the trans-ethnic meta-analysis that were not identified in the  
951 European meta-analysis) dropped below genome-wide significance (**Supplementary Table**  
952 **5**).

953

### 954 **GWAS of offspring birth weight**

955 **European ancestry meta-analysis of offspring birth weight:** The European ancestry GWAS  
956 meta-analysis of offspring BW consisted of three components: (i) 12,319 individuals from 10  
957 European GWAS imputed up to the HapMap 2 reference panel; and (ii) two European GWAS  
958 imputed up to the HRC panel (855 individuals from EFSOCH and 6,687 individuals from  
959 ALSPAC); and (iii) 190,406 individuals of white European origin from the UK Biobank. Studies  
960 from the EGG Consortium conducted genome-wide association analysis on offspring BW  
961 that was Z-score transformed, and adjusted for sex, gestational duration and ancestry  
962 informative principal components where necessary, (**Supplementary Table 3**). We then  
963 combined the BW association summary statistics across the 10 HapMap 2 imputed EGG  
964 studies in a fixed-effects meta-analysis, implemented in GWAMA<sup>54</sup>. We conducted a second  
965 European ancestry fixed-effects meta-analysis to combine the association summary  
966 statistics from the EGG meta-analysis with the UK Biobank, EFSOCH and ALSPAC (max  
967 N=210,267). The same strategy and variant filtering criteria were applied as in the meta-  
968 analysis of own BW. We also performed a fixed-effects meta-analysis of the association  
969 summary statistics for 18,137 directly genotyped SNPs on the X-chromosome from the UK  
970 Biobank and the meta-analysis of the EGG studies (max N=197,093) using GWAMA<sup>54</sup>. None  
971 of the lead SNPs showed evidence of heterogeneity in BW allelic effects, after Bonferroni  
972 correction (Cochran's Q  $P > 0.00060$ ), between the UK Biobank and EGG studies and there  
973 was no enrichment for low P, with only 1/81 SNPs with  $P < 0.05$  (**Supplementary Table 5**).  
974 Using bivariate LD score regression<sup>19</sup>, we observed a regression intercept of 0.0165  
975 (0.0063), indicating that the equivalent of approximately 1,015 individuals were in both the  
976 EGG and UK Biobank GWAS analyses of offspring BW.

977 Univariate LD score regression<sup>56</sup> of the European ancestry meta-analysis estimated the  
978 genomic inflation as 1.05. Similar to the own BW GWAS results, we recalculated the P-  
979 values after adjusting the test statistics for this LD score intercept and the lead SNP at 8 loci  
980 (out of 81) dropped below genome-wide significance (**Supplementary Table 5**).

981

982 **Approximate conditional and joint multiple-SNP (COJO) analysis to identify additional**  
983 **independent signals for offspring birth weight:** We performed approximate COJO analysis<sup>13</sup>  
984 using the European ancestry meta-analysis summary statistics of offspring BW, using the  
985 same reference panel as in the own BW analysis. Similarly to the analysis of own BW, SNPs  
986 labelled by GCTA as "independent" and not in LD with the original lead SNP ( $R^2 < 0.05$ ) were  
987 listed as secondary SNPs associated with offspring BW.

988

989 **Trans-ethnic meta-analysis of offspring birth weight:** We conducted a trans-ethnic meta-  
990 analysis combining three components: (i) 12,319 individuals from 10 European GWAS  
991 imputed up to the HapMap 2 reference panel; and (ii) two European GWAS imputed up to  
992 the HRC panel (855 individuals from EFSOCH and 6,686 individuals from ALSPAC); and (iii)  
993 210,208 individuals of all ancestry from the UK Biobank. The same strategy and variant  
994 filtering criteria were applied as in the European meta-analysis of offspring BW  
995 (**Supplementary Figure 2**). None of the lead SNPs showed evidence of heterogeneity in BW



996 allelic effects, after Bonferroni correction (Cochran's  $Q$   $P > 0.00054$ ), between the UK Biobank  
997 and EGG studies; however, there was an enrichment for low  $P$ , with 3/14 SNPs with  $P < 0.05$   
998 (expected 1; **Supplementary Table 5**). Univariate LD score regression<sup>56</sup> of the trans-ethnic  
999 meta-analysis estimated the genomic inflation as 1.04. We adjusted the test statistics for  
1000 this LD score regression intercept, and the corresponding adjusted  $P$ -values for the lead SNP  
1001 at 6 loci (out of 14 that were added to our genome-wide significant loci from the trans-  
1002 ethnic meta-analysis that were not identified in the European meta-analysis) dropped below  
1003 genome-wide significance (**Supplementary Table 5**).

1004

### 1005 **Colocalization methods**

1006 For each signal where we identified different lead SNPs in the GWAS of own BW and  
1007 offspring BW, we performed co-localization analysis using the method implemented in the  
1008 "coloc" R package<sup>58</sup>. For each signal, we input the regression coefficients, their variances  
1009 and SNP minor allele frequencies for all SNPs 500kb up and downstream of the lead SNP  
1010 from the European meta-analysis. We used the `coloc.abf()` function to calculate posterior  
1011 probabilities that the own BW and offspring BW lead SNPs were independent ( $H_3$ ) or shared  
1012 the same associated variant ( $H_4$ ). Default values were used for the prior probabilities in the  
1013 `coloc.abf()` function. We call variants the same signal if the  $H_4$  posterior probability was  
1014 greater than 0.50, and different signals if the  $H_3$  posterior probability was greater than 0.50.

1015

### 1016 **Estimation of genetic variance explained**

1017 Firstly, we estimated the proportion of BW variance explained by fetal genotypes, maternal  
1018 genotypes and the covariance between the two at the 278 genome-wide significant signals  
1019 in the Norwegian Mother and Child Cohort Study (MoBa-HARVEST;  $N = 13,934$  mother-  
1020 offspring pairs; <https://www.fhi.no/en/studies/moba/>). This sample was independent of  
1021 samples contributing to the discovery meta-analyses, apart from a small potential overlap  
1022 with mothers from the MoBa-2008 sample that was included in the GWAS of offspring BW  
1023 (affecting a maximum of 0.07% of the meta-analysis sample). For the 27 signals that had a  
1024 maternal and fetal SNP, the fetal SNP was used in the analysis. This was to avoid any  
1025 collinearity in the model due to the high correlation between the maternal and fetal SNPs.  
1026 One SNP, rs77553582, was not available in MoBa-HARVEST, so we used a proxy SNP,  
1027 rs2024344, in the analysis ( $r^2 = 0.998$  between rs77553582 and rs2024344). We excluded  
1028 multiple births, babies of non-European descent, born before 37 weeks of gestation, born  
1029 with a congenital anomaly or still-born. BW was Z-score transformed and all models were  
1030 adjusted for sex, gestational duration and the first 4 ancestry informative principal  
1031 components. We conducted a linear regression analysis in  $R$ <sup>59</sup> using 13,934 mother-offspring  
1032 pairs where offspring BW was regressed on the maternal and fetal genotypes at all 278 SNPs  
1033 simultaneously. The proportion of variance explained by fetal genotypes at the 278  
1034 genome-wide significant signals was calculated as:

1035

$$\sum_{i=1}^{278} \frac{2p_i(1-p_i)\hat{\beta}_{f_i}^2}{\text{var}(BW)}$$

1036 Where  $p_i$  is the effect allele frequency of the  $i^{\text{th}}$  SNP,  $\hat{\beta}_{f_i}$  is the regression coefficient for the  
1037 effect of the offspring's genotype at the  $i^{\text{th}}$  SNP on offspring BW and  $\text{var}(BW)$  is the variance  
1038 of offspring BW (which is approximately 1 as BW was Z-score transformed). A similar  
1039 formula was used to calculate the variance explained by maternal genotypes:

1040

$$\sum_{i=1}^{278} \frac{2p_i(1-p_i)\hat{\beta}_{m_i}^2}{\text{var}(BW)}$$

1041

Where  $\hat{\beta}_{m_i}$  is the regression coefficient for the effect of the maternal genotype at the  $i^{\text{th}}$

1042

SNP on offspring BW. Finally, a similar formula was used to calculate twice the covariance:

1043

$$\sum_{i=1}^{278} \frac{2p_i(1-p_i)\hat{\beta}_{f_i}\hat{\beta}_{m_i}}{\text{var}(BW)}$$

1044

1045

Secondly, we used maternal genome-wide complex trait analysis<sup>11</sup> (M-GCTA) to estimate the proportion of variance explained in BW by genome-wide SNPs, or SNPs they tag, in the fetal genome, the maternal genome, the covariance between the two or environmental factors in MoBa-HARVEST. The same phenotype was used as in the previous analysis and the model was adjusted for sex and gestational duration. Mothers or offspring were excluded if they were related to others in the sample, using a genetic relationship cut-off 0.025, leaving N=7,910 mother-offspring pairs available for analysis.

1052

1053

### Identifying eQTL linked genes

1054

To identify specific eQTL linked genes, we used the FUSION tool<sup>60</sup> on the v6p release of the GTEx data<sup>15</sup>. FUSION is a gene-based data aggregation and integration method which incorporates information from gene-expression data and GWAS data to translate evidence of association with a phenotype from the SNP-level to the gene. Only gene level results from the adjusted model were taken forward for consideration. The threshold for statistical significance was estimated using the Bonferroni method for multiple testing correction across all tested tissues (tissue N=44,  $P < 6 \times 10^{-7}$ ). Each of the genes implicated by this analysis survived multiple test correction and were independent from other proximal genes tested in a joint model.

1063

1064

### Placenta eQTL look ups

1065

We annotated genome-wide significant BW-associated SNPs with gene expression data (293/305 SNPs available) from placental samples of European ancestry from the Rhode Island Child Health Study<sup>16</sup> (RICHHS; N=123 with fetal genotype, including 71 with BW appropriate for gestational age, 15 small for gestational age, and 37 large for gestational age). We annotated genome-wide significant BW-associated SNPs on our list that had genome-wide empirical FDR<0.01 for association with one or more transcripts and  $r^2 > 0.7$  with a lead eQTL SNP.

1072

1073

### TAD pathways

1074

Topologically associating domains (TAD) pathway analysis was performed using software described in Way *et al.*<sup>17</sup>. Briefly, the software uses publicly available TAD boundaries, identified in human embryonic stem cells and fibroblasts using a Hidden Markov Model<sup>18</sup>, to prioritize candidate genes at GWAS SNPs. These TAD boundaries are stable across different cell types and therefore can be used to identify genomic regions where non-coding causal variants will most likely impact tissue-independent function.

1080

1081



1082 **Structural equation model for estimating adjusted maternal and fetal effects of the**  
1083 **genome-wide significant variants**

1084 The structural equation modelling (SEM) approach used to estimate maternal and fetal  
1085 effects that are independent of the fetal and maternal genotype respectively has been  
1086 described elsewhere<sup>12</sup>. Briefly, to estimate the parameters for the SEM-adjusted fetal and  
1087 maternal effects on BW, we use three observed variables available in the UK Biobank; the  
1088 participant's genotype, their own self-reported BW, and in the case of the UK Biobank  
1089 women, the BW of their first child (**Supplementary Figure 17**). Additionally, the model  
1090 comprises two latent (unobserved) variables, one for the genotype of the UK Biobank  
1091 participant's mother and one for the genotype of the participant's offspring. From  
1092 biometrical genetics theory, these latent genetic variables are correlated 0.5 with the  
1093 participant's own genotype, so we fix the path coefficients between the latent and observed  
1094 genotypes to be 0.5. Participants who only report their own BW (including males),  
1095 contribute directly to estimation of the fetal effect of genotype on BW and also indirectly to  
1096 estimation of the maternal effect on BW since their observed genotype is correlated with  
1097 their mother's unmeasured latent genotype at the same locus. Similarly, summary statistics  
1098 from the EGG meta-analysis of the unadjusted fetal effect (i.e. the European GWAS meta-  
1099 analysis of own BW) can be incorporated into the model in this manner. Participants who  
1100 report only their offspring's BW (including mother's reporting BW of their male offspring),  
1101 contribute directly to estimation of the maternal effect on BW and indirectly to the estimate  
1102 of the fetal effect on BW, since their observed genotype is correlated with their offspring's  
1103 latent genotype at the same locus. Again, summary statistics from the EGG meta-analysis of  
1104 the unadjusted maternal effect (i.e. the European GWAS meta-analysis of offspring BW) can  
1105 be incorporated into the model this way. These five components are fit to the five subsets  
1106 of data (i.e. the UK Biobank participants with complete data, the UK Biobank participants  
1107 with their own BW and genotype data only, EGG summary statistics for the unadjusted fetal  
1108 effect of genotype on BW, the UK Biobank participants with their offspring's BW and  
1109 maternal genotype only and EGG summary statistics for the unadjusted maternal effect of  
1110 genotype on BW) and then the likelihoods from each subset are combined. In addition to  
1111 fitting the SEM to estimate the SEM-adjusted maternal and fetal effects, we fit a second  
1112 model constraining the maternal and fetal effects to be zero and conducted a two degree of  
1113 freedom Wald test to assess any effect of the SNP on BW. There is likely to be measurement  
1114 error in the BW data in the UK Biobank, as well as some of the EGG studies, due to difficulty  
1115 recalling BW. Additionally, the women in UK Biobank were asked to recall their offspring BW  
1116 to the nearest pound. We have shown using simulations that both random measurement  
1117 error (for example, due to difficulty in recall) and measurement error in offspring BW due to  
1118 rounding to the nearest pound do not have a substantial influence on the estimation of  
1119 either the maternal or fetal effects (see Warrington et al. <sup>12</sup>). We therefore do not think that  
1120 the imprecision of the UK Biobank BW data will substantially influence the results of  
1121 downstream analyses.

1122 The SEM was fit to data from 210 genome-wide significant fetal and 105 maternal SNPs  
1123 from the GWAS meta-analysis; rs77553582, was only available in the GWAS of own BW from  
1124 the EGG consortium so the SEM was not fit for this SNP (**Supplementary Figure 4**). In order  
1125 to identify a subset of unrelated individuals in the UK Biobank (as the SEM cannot easily  
1126 account for relatedness), we generated a genetic relationship matrix in the GCTA software  
1127 package<sup>57</sup> (version 1.90.2) and excluded one of every pair of related individuals with a  
1128 genetic relationship greater than 9.375% (i.e. approximately half-way between third and

1129 fourth degree relatives). This gave us a subset of 382,001 unrelated individuals of European  
1130 descent, after the same exclusions were made as in the GWAS, of which 85,518 individuals  
1131 had reported their own BW and their offspring's BW, 98,235 individuals reported their own  
1132 BW only, and 73,981 reported their offspring's BW only (the remaining 124,267 unrelated  
1133 European individuals reported neither so were excluded from the analysis). We fit linear  
1134 regression models to BW and offspring BW in the European, unrelated subset of individuals  
1135 and adjusted for sex (own BW only), assessment centre and the top 40 ancestry informative  
1136 principal components provided by the UK Biobank to account for any remaining population  
1137 substructure. The residuals from this regression models were Z-score transformed for  
1138 analysis. Because we included the summary statistics from the meta-analysis of the EGG  
1139 studies, rather than the individual level data, we were unable to account for the small  
1140 subset individuals who contributed to both the own BW and offspring BW GWAS meta-  
1141 analyses. Based on the results from simulations (not shown), we expect that this non-  
1142 independence will result in very slightly smaller standard errors and increased type 1 error  
1143 rate, particularly for the fetal effect which is estimated from a larger sample size than was  
1144 available to estimate the maternal effect. Therefore, we conducted a sensitivity analysis  
1145 that first excluded EGG studies from the meta-analysis of own BW that contributed to both  
1146 GWAS meta-analyses of own and offspring BW (e.g. ALSPAC), and then refitted the non-  
1147 overlapping data in the SEM; these results are presented in **Supplementary Table 19**. For  
1148 the four genome-wide significant SNPs identified on the X chromosome, we fit a slightly  
1149 different SEM due to males having double the expected genetic variance at X linked loci  
1150 compared to females. We did not incorporate summary statistics from the EGG consortium  
1151 (since GWAS results were not stratified according to sex), so the model only includes the  
1152 individual level data from the UK Biobank (additional details on the X chromosome analysis  
1153 are provided in the **Supplementary Material** and **Supplementary Figure 18**).  
1154 We used the estimates from the SEM to classify SNPs into the following five categories; 1)  
1155 **fetal only**: the 95% confidence interval surrounding the fetal effect estimate does not  
1156 overlap zero and does not overlap the 95% confidence interval around the maternal effect  
1157 estimate. Additionally, the 95% confidence surrounding the maternal effect estimate  
1158 overlaps zero; 2) **maternal only**: the 95% confidence interval surrounding the maternal  
1159 effect estimate does not overlap zero and does not overlap the 95% confidence interval  
1160 around the fetal effect estimate. Additionally, the 95% confidence surrounding the fetal  
1161 effect estimate overlaps zero; 3) **fetal and maternal, effects going in the same direction**:  
1162 the 95% confidence intervals around both the maternal and fetal effect estimates do not  
1163 overlap zero, and their effect is in the same direction; 4) **fetal and maternal, effects going**  
1164 **in opposite direction**: the 95% confidence intervals around both the maternal and fetal  
1165 effect estimates do not overlap zero, and their effects are in opposite directions; and 5)  
1166 **unclassified**: SNPs that do not fall into any of these categories, and therefore the 95%  
1167 confidence intervals around the maternal and fetal effect estimates overlap, and at least  
1168 one overlaps zero.

1169

#### 1170 **Meta-analysis of maternal and fetal effects from a conditional regression analysis in** 1171 **mother-offspring pairs**

1172 We conducted conditional association analyses for all 305 genome-wide significant SNPs in  
1173 18,873 mother-offspring pairs from three studies (MoBa-HARVEST, ALSPAC and EFSOCH)  
1174 adjusting for both maternal and offspring genotype and combined the summary statistics  
1175 for each SNP in a fixed effects meta-analysis using METAL<sup>61</sup>. We compared the estimates of

1176 the maternal and fetal effects of this meta-analysis to the SEM-adjusted maternal and fetal  
1177 effects using a heterogeneity test, and the results are presented in **Supplementary Table 6**.

1178

### 1179 **Approximation of the SEM for genome-wide analyses**

1180 The SEM is computationally intensive to fit, making it difficult to run on all SNPs across the  
1181 genome. Therefore, we developed an approximation of the SEM using a linear  
1182 transformation of the BW values and ordinary least squares linear regression, which we  
1183 refer to as the weighted linear model adjusted (WLM-adjusted) analyses. The full details of  
1184 the derivation are provided in the **Supplementary Material**. Briefly, from ordinary least  
1185 squares regression we know that the estimated fetal effect size from the GWAS of own BW,  
1186  $\hat{\beta}_{f_{unadj}}$ , is calculated by dividing the sample covariance between BW and SNP by the sample  
1187 variance of the SNP. Similarly, the estimated maternal effect from the GWAS of offspring  
1188 BW,  $\hat{\beta}_{m_{unadj}}$ , is calculated by dividing the sample covariance between offspring BW and SNP  
1189 by the sample variance of the SNP. It follows that an estimate of the fetal effect adjusted for  
1190 the maternal genotype is (see **Supplementary Material** for full derivation):

$$1191 \quad \hat{\beta}_{f_{adj}} = -\frac{2}{3}\hat{\beta}_{m_{unadj}} + \frac{4}{3}\hat{\beta}_{f_{unadj}}$$

1192 and an estimate of the maternal effect adjusted for the fetal genotype is:

$$1193 \quad \hat{\beta}_{m_{adj}} = \frac{4}{3}\hat{\beta}_{m_{unadj}} - \frac{2}{3}\hat{\beta}_{f_{unadj}}$$

1194 If the model is truly linear, then the same estimates can be obtained by transforming the  
1195 reported BWs rather than the regression coefficients<sup>62</sup>. Similar to the SEM analyses, BW Z-  
1196 scores in the UK Biobank participants were calculated from residuals of a regression model  
1197 adjusting for sex (own BW only) and assessment centre, after the same exclusions were  
1198 made as in the GWAS. For the UK Biobank participants who reported both their own BW  
1199 and the BW of their offspring (N=101,541), we combined their BW Z-scores using the above  
1200 formulae and conducted a GWAS in BOLT-LMM<sup>52</sup> to directly estimate the WLM-adjusted  
1201 fetal and maternal effects for each SNP (see **Supplementary Figure 19** for a flow diagram of  
1202 the full analysis pipeline). For the UK Biobank participants who only reported their own BW  
1203 (N=115,070), we conducted a GWAS of their own BW Z-score in BOLT-LMM to estimate the  
1204 unadjusted fetal effect for each SNP and then meta-analyzed the results with the  
1205 unadjusted fetal effect estimates from the EGG consortium using a fixed-effects, inverse-  
1206 variance weighted meta-analysis in METAL<sup>61</sup>. We followed the same procedure using  
1207 participants who only reported their offspring's BW in the UK Biobank (N=88,846) and meta-  
1208 analyzed the unadjusted maternal effect estimates with those from the EGG consortium.  
1209 The UK Biobank sample sizes used in this analysis are larger than those used in the SEM as  
1210 the GWAS analyses are conducted in BOLT-LMM and can therefore account for the complex  
1211 cryptic relationships between individuals. To get the WLM-adjusted maternal and fetal  
1212 effect estimates, we combined the meta-analysis results of the unadjusted maternal and  
1213 fetal effects for each SNP using the formulae above and their corresponding standard errors  
1214 (see **Supplementary Material**). Finally, we conducted another fixed-effects, inverse-variance  
1215 weighted meta-analysis to combine the WLM-adjusted maternal and fetal effect estimates  
1216 from the UK Biobank participants with both BW measures and the combined WLM-adjusted  
1217 effect estimates from the UK Biobank and EGG meta-analysis. A comparison of the results  
1218 using this WLM method and the full SEM for the genome-wide significant SNPs is presented  
1219 in **Supplementary Figure 8**.

1220

## 1221 **Gene expression integration**

1222 In order to identify which tissue types were most relevant to genes involved in BW, we  
1223 applied LD score regression to specifically expressed genes (“LDSC-SEG”)<sup>20</sup>. We used the  
1224 summary statistics from the GWAS meta-analysis of own and offspring BW and the WLM-  
1225 adjusted meta-analyses, where the summary statistics from the WLM-adjusted meta-  
1226 analyses were used to obtain tissue specific enrichments un-confounded by maternal and  
1227 fetal genetic sharing. The method has been described previously<sup>20</sup>, but in brief it takes each  
1228 tissue, ranking genes by a t-statistic for differential expression, using sex and age as  
1229 covariates, and excluding all samples in related tissues. It then takes the top 10% of ranked  
1230 genes, and makes a genome annotation including these genes (exons and introns) plus  
1231 100kb on either side. Finally, it uses stratified LD score regression to estimate the  
1232 contribution of this annotation to per-SNP BW heritability, adjusting for all categories in the  
1233 baseline model. We computed significance using a block jackknife over SNPs, and corrected  
1234 for the number of tissues tested.

1235

## 1236 **Gene-set enrichment analysis (MAGENTA)**

1237 Pathway-based associations using summary statistics from the GWAS meta-analysis of own  
1238 and offspring BW and WLM-adjusted meta-analysis for both the maternal and fetal effect  
1239 were tested using MAGENTA<sup>63</sup>. Briefly, the software maps each gene to the SNP with the  
1240 lowest P-value within a 110kb upstream and 40kb downstream window. This P-value is  
1241 corrected for factors such as SNP density and gene size using a regression model. Genes  
1242 within the HLA region were excluded. The observed number of gene scores within a given  
1243 pathway with a ranked gene score above a given threshold (95<sup>th</sup> or 75<sup>th</sup> percentile) was  
1244 calculated. This statistic was compared with 1,000,000 randomly permuted pathways of the  
1245 same size to calculate an empirical P-value for each pathway. We considered pathways with  
1246 false discovery rate (FDR) < 0.05 to be of interest. The 3,230 biological pathways tested  
1247 were from the BIOCARTA, Gene Ontology, KEGG, PANTHER and READTOME databases along  
1248 with a small number of custom pathways.

1249

## 1250 **Gestational duration associations**

1251 We extracted the 305 genome-wide significant BW-associated SNPs from the summary  
1252 statistics in a recent GWAS of gestational duration<sup>21</sup>. The full table of 23andMe summary  
1253 statistics was obtained directly from 23andMe. For BW SNPs that were also associated with  
1254 gestational duration ( $P < 1.6 \times 10^{-4}$ , corrected for 305 tests), we followed them up in 13,206  
1255 mother-child pairs from the MoBa-HARVEST, ALSPAC and EFSOCH studies. Preterm births  
1256 (gestational duration < 37 weeks) were removed before analysis, and gestational duration  
1257 and BW were both z-score transformed. We conducted linear regression analyses to test the  
1258 association between maternal or fetal genotype (unadjusted genotype effects) and  
1259 gestational duration, BW or gestational duration adjusted for BW. Additionally, we  
1260 conducted linear regression analyses for the same three outcomes including both the  
1261 maternal and fetal genotypes (adjusted effects). The association analysis results were  
1262 combined using inverse variance weighted meta-analysis. We also combined the unadjusted  
1263 maternal SNP-gestational duration associations with the 23andMe summary statistics from  
1264 Zhang *et al.*<sup>21</sup> using P value based meta-analysis implemented in METAL<sup>61</sup>.

1265

1266



## 1267 **Association between birth weight-associated SNPs and a variety of traits in the UK**

### 1268 **Biobank**

1269 We performed GWAS on 78 traits in the UK Biobank using BOLT-LMM in an analogous way  
1270 to analysis of own BW. Association statistics for the 305 genome-wide significant BW-  
1271 associated SNPs were then extracted from the results. Phenotype definitions for the 78  
1272 traits are described in Frayling *et al.*<sup>64</sup>. Additionally, for the 305 genome-wide significant  
1273 BW-associated SNPs, and those in high LD with the 305 SNPs ( $r^2 > 0.8$ ), we searched the  
1274 NHGRI GWAS catalog (<https://www.ebi.ac.uk/gwas/>; accessed 16th January 2018) for  
1275 reported GWAS associations with other traits. These are reported in **Supplementary Table**  
1276 **13**.

1277

### 1278 **Linkage-Disequilibrium (LD) score regression**

1279 LD score regression was used to estimate the genetic correlation between two  
1280 traits/diseases and has been described in detail elsewhere<sup>19</sup>. Briefly, the LD score is a  
1281 measure of how much genetic variation each variant tags; so if a variant has a high LD score  
1282 then it is correlated with many nearby variants. Variants with high LD scores are more likely  
1283 to tag true signals and hence provide greater chance of overlap with genuine signals  
1284 between GWAS. The method uses summary statistics from the GWAS meta-analyses of BW  
1285 and the other traits of interest, calculates the cross-product of test statistics at each SNP,  
1286 and then regresses the cross-product on the LD Score. Bulik-Sullivan *et al.*<sup>19</sup> show that the  
1287 slope of the regression is a function of the genetic correlation between traits. Individuals  
1288 contributing to the summary statistics of both GWAS meta-analyses, and population  
1289 stratification within either GWAS, will only influence the intercept of the regression and  
1290 therefore not bias the genetic correlation.

1291 We used LDHub<sup>65</sup> ([ldsc.broadinstitute.org/](http://ldsc.broadinstitute.org/)) to perform LD score regression between BW  
1292 and a large range of traits and diseases. LDHub is a centralized database which contains  
1293 curated summary statistics from GWAS analyses of over 775 traits and diseases, including  
1294 the recent release of summary statistics from GWAS analyses of many phenotypes in the UK  
1295 Biobank ([http://www.nealelab.is/blog/2017/7/19/rapid-gwas-of-thousands-of-phenotypes-  
1296 for-337000-samples-in-the-uk-biobank](http://www.nealelab.is/blog/2017/7/19/rapid-gwas-of-thousands-of-phenotypes-for-337000-samples-in-the-uk-biobank)). Due to the different LD structure across ancestry  
1297 groups, the summary statistics from the European only BW analyses were uploaded to  
1298 LDHub and genetic correlations were calculated for all available phenotypes. We conducted  
1299 four separate analyses in LDHub: one for the GWAS of own BW, one for the GWAS of  
1300 offspring BW, one for the WLM-adjusted fetal effect on own BW and the final one for the  
1301 WLM-adjusted maternal effect on offspring BW.

1302 To calculate the genetic correlation between the maternal and fetal effect estimates from  
1303 the unadjusted and WLM-adjusted analyses, and also between gestational duration and the  
1304 WLM-adjusted maternal and fetal effects, we used the scripts provided by the developer  
1305 (<https://github.com/bulik/ldsc>).

1306

### 1307 **Mendelian randomization analyses of maternal and fetal exposures on offspring birth** 1308 **weight**

1309 Two sample Mendelian randomization analyses were performed for a number of exposures  
1310 with own BW or offspring BW as outcomes. The exposures included height (SD units, where  
1311 1SD = 6cm), fasting glucose (SD units, where 1 SD = 0.4mmol/L), disposition index of insulin  
1312 secretion (calculated from oral glucose tolerance test (OGTT) results as Corrected Insulin  
1313 Response x 10,000 /  $\sqrt{\text{Fasting Plasma Glucose} \times \text{Fasting Insulin} \times \text{Mean Glucose during}}$

1314 OGTT x Mean Insulin During OGTT)<sup>66</sup>), insulin sensitivity (calculated as fasting insulin  
1315 adjusted for BMI) and systolic and diastolic blood pressure (mmHg). The SNP-exposure  
1316 associations were taken from external studies (**Supplementary Table 14**). The SNP-outcome  
1317 associations were taken from the current European GWAS meta-analyses of own BW,  
1318 offspring BW, WLM-adjusted fetal effect on own BW and WLM-adjusted maternal effect on  
1319 offspring BW. Two sample Mendelian randomization regresses effect sizes of SNP-outcome  
1320 associations against effect sizes of SNP-exposure associations, with an inverse-variance  
1321 weighted (IVW) analysis giving similar results to the commonly used two-stage least squares  
1322 analysis in a single sample<sup>67</sup>. We performed several sensitivity analyses to assess the impact  
1323 of genetic pleiotropy on the causal estimates including MR-Egger<sup>68</sup>, Weighted Median  
1324 (WM)<sup>69</sup> and Penalized Weighted Median (PWM)<sup>69</sup> approaches (see **Supplementary Table 15**  
1325 for results). Details of the R code for the MR analyses are provided elsewhere<sup>68,69</sup>.  
1326 Due to the strong negative correlation between estimates of the maternal and fetal genetic  
1327 effects on BW, we conducted simulations to confirm that this correlation did not bias the  
1328 results of downstream MR analyses; these simulations are described in the **Supplementary**  
1329 **Material**.

1330

### 1331 **Transmitted/non-transmitted allele scores in ALSPAC**

1332 Allelic transmission was determined for 4,962 mother/offspring pairs in ALSPAC. We first  
1333 converted maternal and fetal genotypes into best guess genotypes where SNPs of interest  
1334 had been imputed. Where one or both of the mother/offspring pair were homozygous,  
1335 allelic transmission is trivial to determine. Where both mother and offspring were  
1336 heterozygous for the SNP of interest we used phase imputation generated using SHAPEIT2<sup>70</sup>  
1337 to examine the haplotypes in the region of the SNP of interest to determine allelic  
1338 transmission. Weighted allele scores were then generated for maternal non-transmitted,  
1339 shared (maternal transmitted) and paternally inherited fetal alleles for systolic blood  
1340 pressure (SBP), diastolic blood pressure (DBP), fasting glucose, insulin secretion and insulin  
1341 sensitivity. Associations were tested between the weighted allele scores and BW.

1342

### 1343 **Covariance between BW and adult traits explained by genotyped SNPs**

1344 The genetic and residual covariance between BW and several quantitative and/or disease  
1345 phenotypes was calculated in the UK Biobank in the BOLT-LMM<sup>52</sup> implementation of the  
1346 REML method, using directly genotyped SNPs. We included 215,444 individuals with data on  
1347 own BW and 190,406 with data on offspring BW. All individuals were classified as being of  
1348 European ancestry. SNPs with minor allele frequency < 1%, evidence of deviation from  
1349 Hardy-Weinberg equilibrium ( $P \leq 1 \times 10^{-6}$ ) or overall missing rate > 0.015 were excluded,  
1350 resulting in 524,307 SNPs for analysis. Ninety-five per cent confidence intervals for the  
1351 proportion of covariance explained by variants directly genotyped were calculated as  
1352  $g_{cov}/(g_{cov}+r_{cov}) \pm 1.96 * g_{cov}SE/abs(g_{cov}+r_{cov})$  where  $g_{cov}$  is genetic covariance,  $r_{cov}$  is  
1353 residual covariance and  $g_{cov}SE$  is the standard error for  $g_{cov}$  and  $abs$  is the absolute value.  
1354 Details of the phenotype preparation for the adult traits is provided in the **Supplementary**  
1355 **Material**.

1356

### 1357 **Testing for association between maternal SNPs associated with offspring birth weight and** 1358 **later-life offspring blood pressure**

1359 Using the UK Biobank, we tested whether maternal SNPs associated with offspring BW were  
1360 also associated with offspring blood pressure in later life. The UK Biobank released kinship



1361 information generated in KING<sup>71</sup>, which included the kinship coefficients and IBS0 estimates.  
1362 We defined parent/offspring pairs using the kinship coefficient and IBS0 cut-offs  
1363 recommended in Manichaikul *et al.*<sup>71</sup>. There were 6,276 parent/offspring pairs, of which  
1364 5,901 were of European descent and 5,635 unique pairs with blood pressure data (for  
1365 parents who had multiple offspring with blood pressure data, only the oldest offspring was  
1366 included in the analysis); 3,886 mother/offspring pairs and 1,749 father/offspring pairs. We  
1367 tested the relationship between unweighted allelic scores of BW-associated SNPs in  
1368 mothers and offspring SBP (see **Supplementary Material** for SBP phenotype preparation)  
1369 before and after adjusting for offspring genotypes at the same loci. We examined  
1370 unweighted allelic scores consisting of all autosomal genome-wide significant BW-  
1371 associated SNPs available in the UK Biobank (300 SNPs), 103 autosomal SNPs that showed  
1372 evidence of a maternal effect, and a subset of 44 autosomal SNPs that showed evidence  
1373 only of maternal effects on BW. We also looked at the SNPs previously associated with SBP  
1374 (**Supplementary Table 14**) as a sensitivity analysis to rule out the possibility of postnatal  
1375 pleiotropic effects of SNPs contaminating our results, we also tested the relationship  
1376 between allelic scores of BW-associated SNPs in fathers and offspring SBP after adjusting for  
1377 offspring genotype. All analyses were adjusted for offspring age at SBP measurement, sex  
1378 and assessment center.

1379

#### 1380 **Data availability**

1381 The genotype and phenotype data are available upon application from the UK Biobank  
1382 (<http://www.ukbiobank.ac.uk/>). Individual cohorts participating in the EGG consortium  
1383 should be contacted directly as each cohort has different data access policies. GWAS  
1384 summary statistics from this study are available on publication via the EGG website  
1385 (<https://egg-consortium.org/>).

1386

1387 **Figures:**

1388

1389 **Figure 1: Structural equation modelling (SEM)-adjusted fetal and maternal effects for the**  
1390 **289 genome-wide significant SNPs that were identified in the GWAS of either own birth**  
1391 **weight (BW; left panel) or offspring BW (right panel) with minor allele frequency greater**

1392 **than 5%. The colour of each point indicates the SEM-adjusted fetal effect on own BW**  
1393 **association P-value and the shape of each point indicates the SEM-adjusted maternal effect**  
1394 **on offspring BW association P-value. SNPs which are labelled with the name of the closest**  
1395 **gene are those which were identified in the GWAS of own BW but whose effects are**  
1396 **mediated through the maternal genome (left panel) and SNPs that were identified in the**  
1397 **GWAS of offspring BW but whose effects are mediated through the fetal genome (right**  
1398 **panel). SNPs are aligned to the BW increasing allele from the GWAS.**  
1399

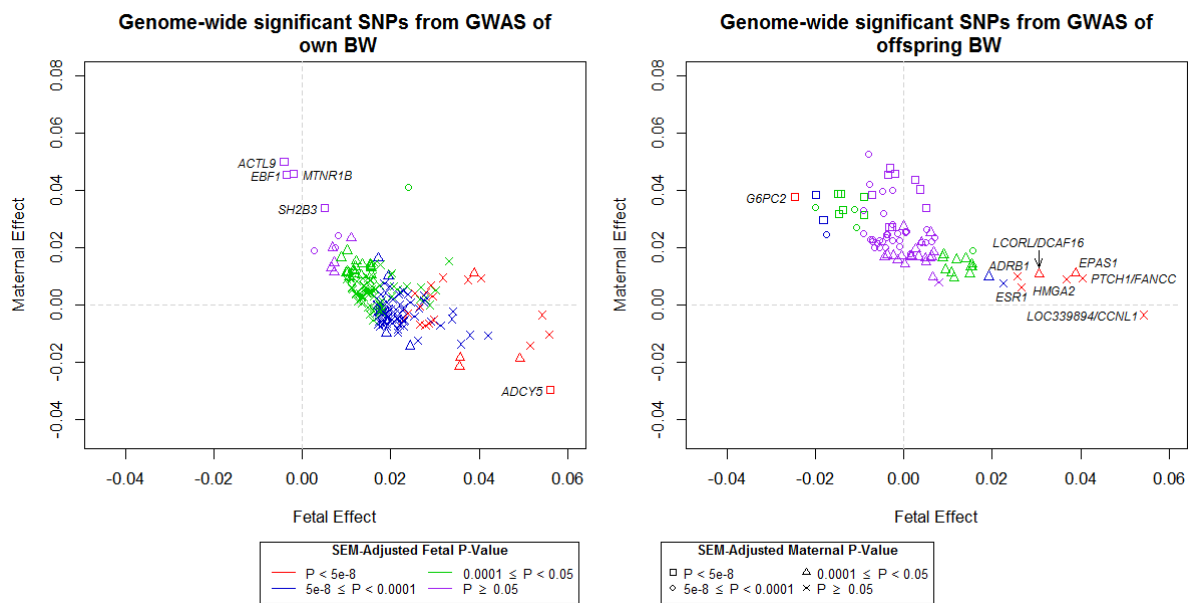

1400

1401 **Figure 2: Genome-wide genetic correlation between birth weight (BW) and a range of**  
 1402 **traits and diseases in later life.** Genetic correlation ( $r_g$ ) and corresponding 95% confidence  
 1403 intervals between BW and the traits were estimated using linkage disequilibrium (LD) score  
 1404 regression in LD Hub. Genetic correlations were estimated from the summary statistics of the  
 1405 weighted linear model (WLM)-adjusted fetal genome-wide association study (GWAS;  
 1406 WLM-adjusted fetal effect on own BW) and the WLM-adjusted maternal GWAS (WLM-  
 1407 adjusted maternal effect on offspring BW). The genetic correlation estimates are colour  
 1408 coded according to their intensity and direction (red for positive correlation and blue for  
 1409 negative correlation). HOMA-B/IR, homeostasis model assessment of beta-cell  
 1410 function/insulin resistance; HbA1c, hemoglobin A1c; ADHD, attention deficit hyperactivity  
 1411 disorder. See **Supplementary Table 10** for the references for each of the traits and diseases  
 1412 displayed and the genetic correlation results for other traits and diseases.  
 1413

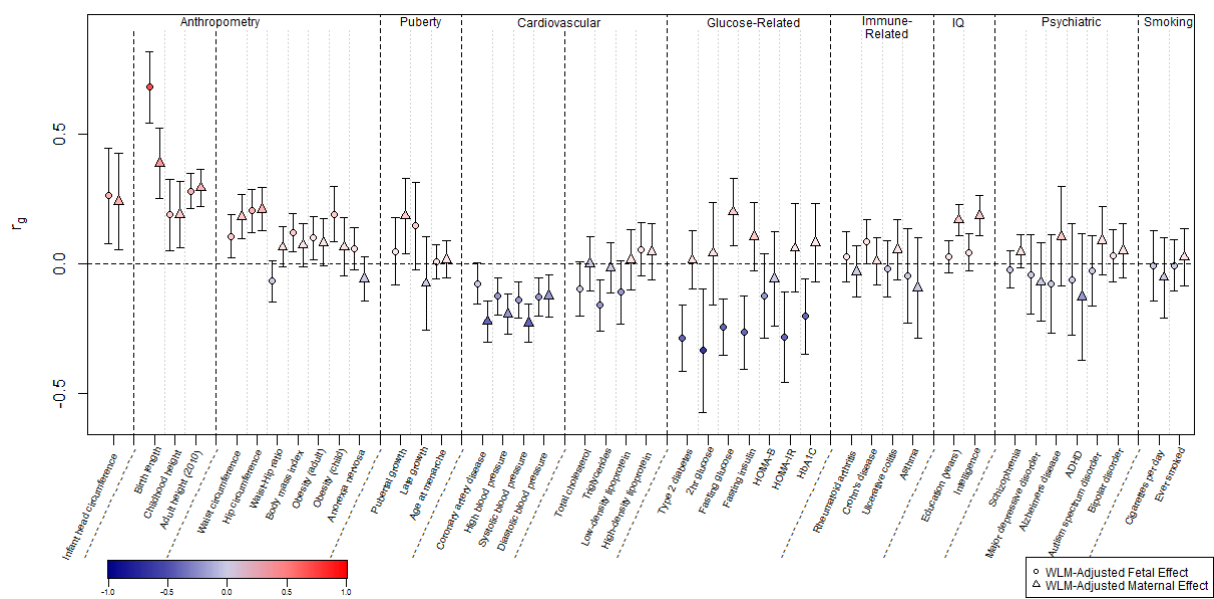

1414

1415 **Figure 3. Mendelian randomization to assess the causal effect of maternal intrauterine**  
1416 **exposures on offspring birth weight** (adapted from Lawlor et al. <sup>44</sup>)  
1417 **A.** Diagram demonstrating how Mendelian randomization may be used to assesses the  
1418 causal effect of a maternal exposure on offspring birth weight (BW). The analysis assumes  
1419 that: (i) maternal genotype (instrumental variable, IV) is robustly associated with maternal  
1420 (intrauterine) exposure; (ii) confounders of the maternal exposure-offspring outcome  
1421 association are not associated with the maternal genetic IV; (iii) the maternal genetic IV is  
1422 only associated with offspring BW through its association with the maternal intrauterine  
1423 exposure, and through no other pathway. Since maternal and fetal genotypes are correlated  
1424 ( $r = 0.5$ ), it is essential to account for the offspring genotype in this analysis.  
1425 The continuous, thin arrow represents the relationship between the genetic instrument and  
1426 intrauterine exposure. The dashed arrows represent potential confounding via maternal  
1427 characteristics. The dotted arrows represent potential violation of assumption 3 via the  
1428 offspring genotype. The thick arrow represents the causal effect of interest estimated in  
1429 Mendelian randomization analyses, after accounting for offspring genotype effects.  
1430  
1431 **B.** Higher offspring BW is caused both by direct fetal genetic effects of height-raising alleles  
1432 and indirect effects of maternal height-raising alleles. Maternal indirect effects of height-  
1433 raising alleles may increase offspring BW by increasing the space available for growth, but  
1434 we cannot rule out alternative pathways e.g. the contribution of assortative mating, which  
1435 would cause the maternal indirect association estimates to be correlated with direct fetal  
1436 effects.  
1437  
1438 **C.** Higher maternal fasting glucose levels are causally associated with higher offspring BW.  
1439 Conversely, in the offspring, a genetic score of alleles known to raise adult fasting glucose  
1440 levels is associated with lower BW, indicating that these alleles have opposite maternal and  
1441 fetal effects on BW. This is likely due to their effects on insulin: variants that lower maternal  
1442 insulin levels lead to higher maternal glucose, which crosses the placenta and stimulates  
1443 fetal insulin-mediated growth. However, the same variants in the fetus cause lower fetal  
1444 insulin levels, and consequently, reduced fetal insulin-mediated growth.  
1445  
1446 **D.** Higher maternal blood pressure is causally associated with lower offspring BW. After  
1447 adjusting for maternal effects, there was no evidence of an effect of the offspring's own SBP  
1448 genetic score on their own BW.  
1449  
1450 SEP, socio-economic position; BW, birth weight; FPG, fasting plasma glucose; SBP, systolic  
1451 blood pressure. 1 SD of BW = 484g<sup>9,44</sup>

**A**

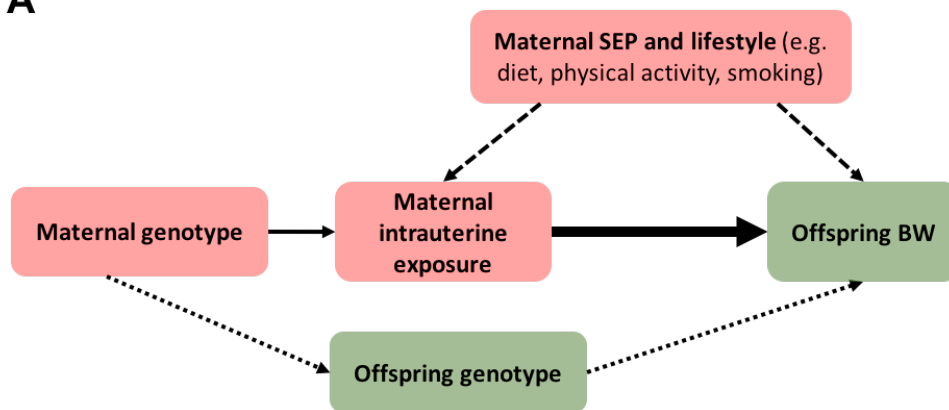

**B**

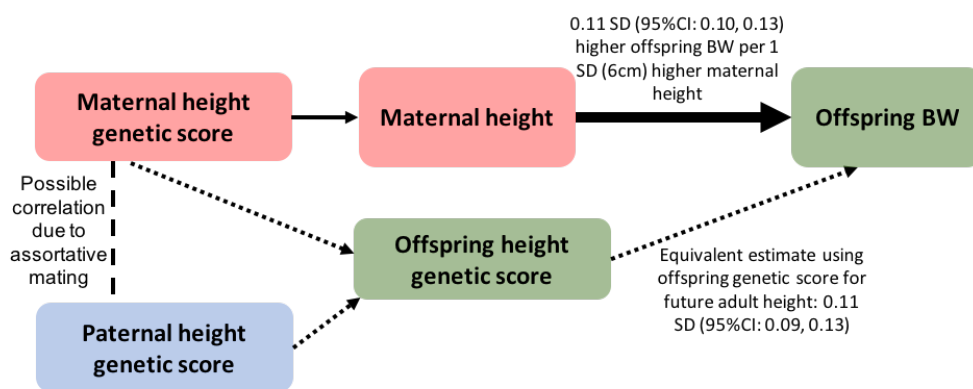

**C**

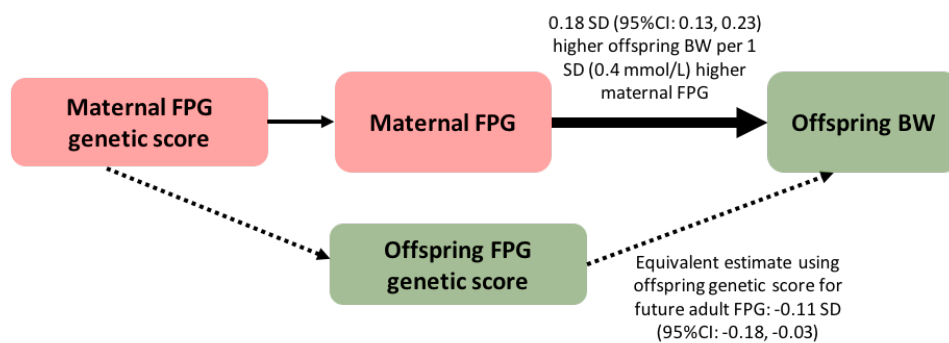

**D**

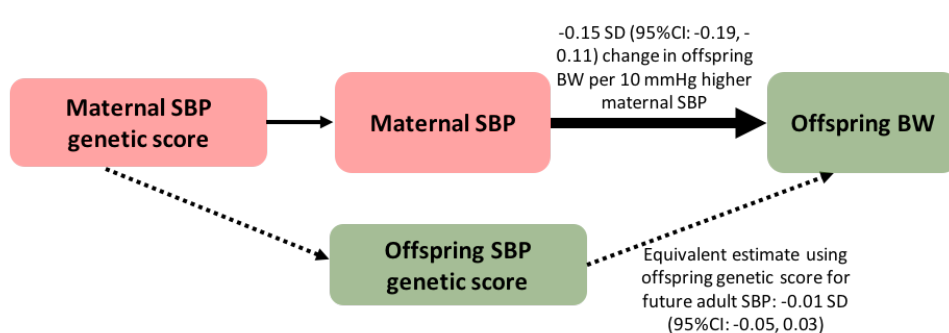



1453 **Figure 4. Mendelian randomization to assess the causal effect of intrauterine growth on**  
1454 **offspring adult outcomes, using maternal intrauterine exposures that influence fetal**  
1455 **growth.**

1456 **A.** Diagram demonstrating how Mendelian randomization may be used to assesses the  
1457 causal effect of intrauterine exposures that affect fetal growth on later-life offspring  
1458 outcomes. The analysis assumptions are the same as in any Mendelian randomization  
1459 analysis (see **Figure 3**). The instrumental variable should be associated with offspring birth  
1460 weight (BW) independently of offspring genotype, so it is again essential to adjust the  
1461 analysis for the offspring genotype.

1462 The continuous, thin, arrow represents the relationship between the genetic instrument  
1463 and intrauterine exposure. The long-dashed arrows denote the (maternal and possibly fetal)  
1464 genotype associations with BW; these arrows highlight the assumption that the genetic  
1465 variation is influencing the offspring adult outcome via intrauterine growth pathways, not  
1466 BW. The short-dashed arrows represent potential confounding via maternal and offspring  
1467 characteristics. The dotted arrow represents potential violation of assumption 3 of  
1468 Mendelian randomization analysis (see **Figure 3** legend) via the offspring genotype. The  
1469 thick arrow represents the causal effect of interest estimated in Mendelian randomization  
1470 analyses, after accounting for offspring genotype effects.

1471 We have not specifically conducted this Mendelian randomization analysis as we do not  
1472 have effect estimates for the SNP-maternal intrauterine exposures influencing fetal growth.  
1473 However, we have used the presence/absence and direction of association in 3,886 mother-  
1474 offspring pairs from the UK Biobank to indicate whether the intrauterine environment was  
1475 causing changes in adult SBP (see **Supplementary Table 18** for full results).

1476  
1477 **B.** Taken together, our results demonstrate that the observed negative correlation between  
1478 BW and later SBP may be driven by the causal effect of higher maternal SBP on lower  
1479 offspring BW (red arrow), in combination with the subsequent transmission of SBP-  
1480 associated alleles to offspring (green arrow), which then increase offspring SBP, rather than  
1481 by long-term developmental compensations to adverse *in utero* conditions.

1482  
1483 SEP, socio-economic position; BW, birth weight; SBP, systolic blood pressure.

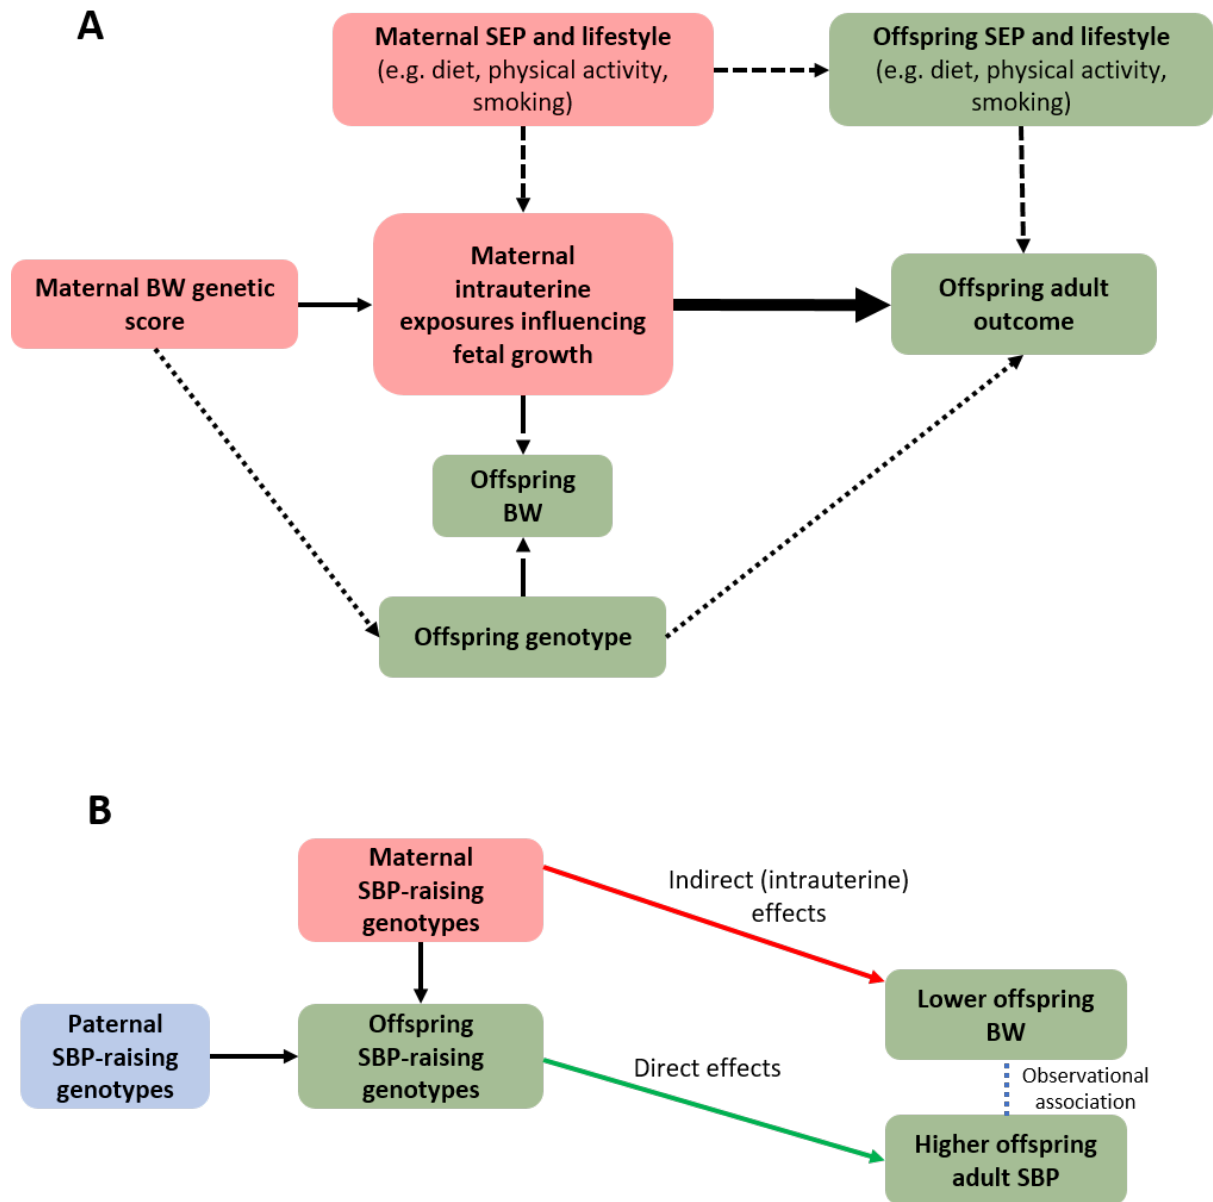

1484

1485 **References**

1486

- 1487 1 Barker, D. J. *et al.* Type 2 (non-insulin-dependent) diabetes mellitus, hypertension  
1488 and hyperlipidaemia (syndrome X): relation to reduced fetal growth. *Diabetologia*  
1489 **36**, 62-67 (1993).
- 1490 2 Martin-Gronert, M. S. & Ozanne, S. E. Mechanisms underlying the developmental  
1491 origins of disease. *Reviews in endocrine & metabolic disorders* **13**, 85-92,  
1492 doi:10.1007/s11154-012-9210-z (2012).
- 1493 3 Lumey, L. H., Stein, A. D. & Susser, E. Prenatal famine and adult health. *Annual*  
1494 *review of public health* **32**, 237-262, doi:10.1146/annurev-publhealth-031210-  
1495 101230 (2011).
- 1496 4 Ben-Shlomo, Y. & Smith, G. D. Deprivation in infancy or in adult life: which is more  
1497 important for mortality risk? *Lancet* **337**, 530-534 (1991).
- 1498 5 Horikoshi, M. *et al.* Genome-wide associations for birth weight and correlations with  
1499 adult disease. *Nature* **538**, 248-252, doi:10.1038/nature19806 (2016).
- 1500 6 Hattersley, A. T. & Tooke, J. E. The fetal insulin hypothesis: an alternative explanation  
1501 of the association of low birthweight with diabetes and vascular disease. *Lancet* **353**,  
1502 1789-1792, doi:10.1016/s0140-6736(98)07546-1 (1999).
- 1503 7 Beaumont, R. N. *et al.* Genome-wide association study of offspring birth weight in 86  
1504 577 women identifies five novel loci and highlights maternal genetic effects that are  
1505 independent of fetal genetics. *Hum Mol Genet* **27**, 742-756,  
1506 doi:10.1093/hmg/ddx429 (2018).
- 1507 8 Horikoshi, M. *et al.* New loci associated with birth weight identify genetic links  
1508 between intrauterine growth and adult height and metabolism. *Nat Genet* **45**, 76-82,  
1509 doi:10.1038/ng.2477 (2013).
- 1510 9 Freathy, R. M. *et al.* Variants in ADCY5 and near CCNL1 are associated with fetal  
1511 growth and birth weight. *Nat Genet* **42**, 430-435, doi:10.1038/ng.567 (2010).
- 1512 10 Hattersley, A. T. *et al.* Mutations in the glucokinase gene of the fetus result in  
1513 reduced birth weight. *Nat Genet* **19**, 268-270, doi:10.1038/953 (1998).
- 1514 11 Eaves, L. J., Pourcain, B. S., Smith, G. D., York, T. P. & Evans, D. M. Resolving the  
1515 effects of maternal and offspring genotype on dyadic outcomes in genome wide  
1516 complex trait analysis ("M-GCTA"). *Behavior genetics* **44**, 445-455,  
1517 doi:10.1007/s10519-014-9666-6 (2014).
- 1518 12 Warrington, N. M., Freathy, R. M., Neale, M. C. & Evans, D. M. Using structural  
1519 equation modelling to jointly estimate maternal and fetal effects on birthweight in  
1520 the UK Biobank. *International journal of epidemiology*, doi:10.1093/ije/dyy015  
1521 (2018).
- 1522 13 Yang, J. *et al.* Conditional and joint multiple-SNP analysis of GWAS summary statistics  
1523 identifies additional variants influencing complex traits. *Nat Genet* **44**, 369-375,  
1524 s361-363, doi:10.1038/ng.2213 (2012).
- 1525 14 Kemp, J. P. *et al.* Identification of 153 new loci associated with heel bone mineral  
1526 density and functional involvement of GPC6 in osteoporosis. *Nat Genet* **49**, 1468-  
1527 1475, doi:10.1038/ng.3949 (2017).
- 1528 15 GTEx Consortium. Human genomics. The Genotype-Tissue Expression (GTEx) pilot  
1529 analysis: multitissue gene regulation in humans. *Science (New York, N.Y.)* **348**, 648-  
1530 660, doi:10.1126/science.1262110 (2015).

- 1531 16 Peng, S. *et al.* Expression quantitative trait loci (eQTLs) in human placentas suggest  
1532 developmental origins of complex diseases. *Hum Mol Genet* **26**, 3432-3441,  
1533 doi:10.1093/hmg/ddx265 (2017).
- 1534 17 Way, G. P., Youngstrom, D. W., Hankenson, K. D., Greene, C. S. & Grant, S. F.  
1535 Implicating candidate genes at GWAS signals by leveraging topologically associating  
1536 domains. *European journal of human genetics : EJHG* **25**, 1286-1289,  
1537 doi:10.1038/ejhg.2017.108 (2017).
- 1538 18 Dixon, J. R. *et al.* Topological domains in mammalian genomes identified by analysis  
1539 of chromatin interactions. *Nature* **485**, 376-380, doi:10.1038/nature11082 (2012).
- 1540 19 Bulik-Sullivan, B. *et al.* An atlas of genetic correlations across human diseases and  
1541 traits. *Nat Genet* **47**, 1236-1241, doi:10.1038/ng.3406 (2015).
- 1542 20 Finucane, H. K. *et al.* Heritability enrichment of specifically expressed genes identifies  
1543 disease-relevant tissues and cell types. *Nat Genet* **50**, 621-629, doi:10.1038/s41588-  
1544 018-0081-4 (2018).
- 1545 21 Zhang, G. *et al.* Genetic Associations with Gestational Duration and Spontaneous  
1546 Preterm Birth. *The New England journal of medicine* **377**, 1156-1167,  
1547 doi:10.1056/NEJMoa1612665 (2017).
- 1548 22 Smith, G. D. & Ebrahim, S. 'Mendelian randomization': can genetic epidemiology  
1549 contribute to understanding environmental determinants of disease? *International  
1550 journal of epidemiology* **32**, 1-22 (2003).
- 1551 23 Smith, G. D. *et al.* Clustered environments and randomized genes: a fundamental  
1552 distinction between conventional and genetic epidemiology. *PLoS Med* **4**, e352,  
1553 doi:10.1371/journal.pmed.0040352 (2007).
- 1554 24 Tyrrell, J. *et al.* Genetic Evidence for Causal Relationships Between Maternal Obesity-  
1555 Related Traits and Birth Weight. *JAMA : the journal of the American Medical  
1556 Association* **315**, 1129-1140, doi:10.1001/jama.2016.1975 (2016).
- 1557 25 Pierce, B. L. & Burgess, S. Efficient design for Mendelian randomization studies:  
1558 subsample and 2-sample instrumental variable estimators. *American journal of  
1559 epidemiology* **178**, 1177-1184, doi:10.1093/aje/kwt084 (2013).
- 1560 26 Walton, A. & Hammond, J. The maternal effects on growth and conformation in shire  
1561 horse-shetland pony crosses. *Proceedings of the Royal Society of London. Series B -  
1562 Biological Sciences* **125**, 311-335, doi:10.1098/rspb.1938.0029 (1938).
- 1563 27 Smith, D. W. *et al.* Shifting linear growth during infancy: illustration of genetic factors  
1564 in growth from fetal life through infancy. *The Journal of pediatrics* **89**, 225-230  
1565 (1976).
- 1566 28 Sorensen, T. *et al.* Comparison of associations of maternal peri-pregnancy and  
1567 paternal anthropometrics with child anthropometrics from birth through age 7 y  
1568 assessed in the Danish National Birth Cohort. *The American journal of clinical  
1569 nutrition* **104**, 389-396, doi:10.3945/ajcn.115.129171 (2016).
- 1570 29 Hypponen, E., Power, C. & Smith, G. D. Parental growth at different life stages and  
1571 offspring birthweight: an intergenerational cohort study. *Paediatr Perinat Epidemiol*  
1572 **18**, 168-177, doi:10.1111/j.1365-3016.2004.00556.x (2004).
- 1573 30 Knight, B. *et al.* Evidence of genetic regulation of fetal longitudinal growth. *Early  
1574 Hum Dev* **81**, 823-831, doi:10.1016/j.earlhumdev.2005.06.003 (2005).
- 1575 31 Nahum, G. G. & Stanislaw, H. Relationship of paternal factors to birth weight. *The  
1576 Journal of reproductive medicine* **48**, 963-968 (2003).

- 1577 32 Griffiths, L. J., Dezateux, C. & Cole, T. J. Differential parental weight and height  
1578 contributions to offspring birthweight and weight gain in infancy. *International*  
1579 *journal of epidemiology* **36**, 104-107, doi:10.1093/ije/dyl210 (2007).
- 1580 33 Wood, A. R. *et al.* Defining the role of common variation in the genomic and  
1581 biological architecture of adult human height. *Nat Genet* **46**, 1173-1186,  
1582 doi:10.1038/ng.3097 (2014).
- 1583 34 Zhang, G. *et al.* Assessing the Causal Relationship of Maternal Height on Birth Size  
1584 and Gestational Age at Birth: A Mendelian Randomization Analysis. *PLoS Med* **12**,  
1585 e1001865, doi:10.1371/journal.pmed.1001865 (2015).
- 1586 35 Tyrrell, J. *et al.* Height, body mass index, and socioeconomic status: mendelian  
1587 randomisation study in UK Biobank. *Bmj* **352**, i582, doi:10.1136/bmj.i582 (2016).
- 1588 36 Li, X., Redline, S., Zhang, X., Williams, S. & Zhu, X. Height associated variants  
1589 demonstrate assortative mating in human populations. *Scientific reports* **7**, 15689,  
1590 doi:10.1038/s41598-017-15864-x (2017).
- 1591 37 Pedersen, J. *Diabetes in pregnancy: blood sugar of newborn infants*, (1952).
- 1592 38 Metzger, B. E. *et al.* Hyperglycemia and adverse pregnancy outcomes. *The New*  
1593 *England journal of medicine* **358**, 1991-2002, doi:10.1056/NEJMoa0707943 (2008).
- 1594 39 Crowther, C. A. *et al.* Effect of treatment of gestational diabetes mellitus on  
1595 pregnancy outcomes. *The New England journal of medicine* **352**, 2477-2486,  
1596 doi:10.1056/NEJMoa042973 (2005).
- 1597 40 Jarvelin, M. R. *et al.* Early life factors and blood pressure at age 31 years in the 1966  
1598 northern Finland birth cohort. *Hypertension* **44**, 838-846,  
1599 doi:10.1161/01.HYP.0000148304.33869.ee (2004).
- 1600 41 Tu, Y. K., West, R., Ellison, G. T. & Gilthorpe, M. S. Why evidence for the fetal origins  
1601 of adult disease might be a statistical artifact: the "reversal paradox" for the relation  
1602 between birth weight and blood pressure in later life. *American journal of*  
1603 *epidemiology* **161**, 27-32, doi:10.1093/aje/kwi002 (2005).
- 1604 42 Huxley, R., Neil, A. & Collins, R. Unravelling the fetal origins hypothesis: is there really  
1605 an inverse association between birthweight and subsequent blood pressure? *Lancet*  
1606 **360**, 659-665, doi:10.1016/s0140-6736(02)09834-3 (2002).
- 1607 43 Yaghoobkar, H. & Freathy, R. M. Genetic origins of low birth weight. *Current opinion*  
1608 *in clinical nutrition and metabolic care* **15**, 258-264,  
1609 doi:10.1097/MCO.0b013e328351f543 (2012).
- 1610 44 Lawlor, D. *et al.* Using Mendelian randomization to determine causal effects of  
1611 maternal pregnancy (intrauterine) exposures on offspring outcomes: Sources of bias  
1612 and methods for assessing them. *Wellcome open research* **2**, 11,  
1613 doi:10.12688/wellcomeopenres.10567.1 (2017).
- 1614 45 Wang, T. *et al.* Low birthweight and risk of type 2 diabetes: a Mendelian  
1615 randomisation study. *Diabetologia* **59**, 1920-1927, doi:10.1007/s00125-016-4019-z  
1616 (2016).
- 1617 46 Freathy, R. M. Can genetic evidence help us to understand the fetal origins of type 2  
1618 diabetes? *Diabetologia* **59**, 1850-1854, doi:10.1007/s00125-016-4057-6 (2016).
- 1619 47 Zanetti, D. *et al.* Birthweight, Type 2 Diabetes and Cardiovascular Disease:  
1620 Addressing the Barker Hypothesis with Mendelian randomization. *bioRxiv*,  
1621 doi:10.1101/208629 (2017).



- 1622 48 Zimmermann, E., Gamborg, M., Sorensen, T. I. & Baker, J. L. Sex Differences in the  
1623 Association Between Birth Weight and Adult Type 2 Diabetes. *Diabetes* **64**, 4220-  
1624 4225, doi:10.2337/db15-0494 (2015).
- 1625 49 Gamborg, M. *et al.* Birth weight and systolic blood pressure in adolescence and  
1626 adulthood: meta-regression analysis of sex- and age-specific results from 20 Nordic  
1627 studies. *American journal of epidemiology* **166**, 634-645, doi:10.1093/aje/kwm042  
1628 (2007).
- 1629 50 Kong, A. *et al.* The nature of nurture: Effects of parental genotypes. *Science (New*  
1630 *York, N.Y.)* **359**, 424-428, doi:10.1126/science.aan6877 (2018).
- 1631 51 Bycroft, C. *et al.* Genome-wide genetic data on ~500,000 UK Biobank participants.  
1632 *bioRxiv*, doi:10.1101/166298 (2017).
- 1633 52 Loh, P. R. *et al.* Efficient Bayesian mixed-model analysis increases association power  
1634 in large cohorts. *Nat Genet* **47**, 284-290, doi:10.1038/ng.3190 (2015).
- 1635 53 Auton, A. *et al.* A global reference for human genetic variation. *Nature* **526**, 68-74,  
1636 doi:10.1038/nature15393 (2015).
- 1637 54 Magi, R. & Morris, A. P. GWAMA: software for genome-wide association meta-  
1638 analysis. *BMC bioinformatics* **11**, 288, doi:10.1186/1471-2105-11-288 (2010).
- 1639 55 Ioannidis, J. P., Patsopoulos, N. A. & Evangelou, E. Heterogeneity in meta-analyses of  
1640 genome-wide association investigations. *PLoS one* **2**, e841,  
1641 doi:10.1371/journal.pone.0000841 (2007).
- 1642 56 Bulik-Sullivan, B. K. *et al.* LD Score regression distinguishes confounding from  
1643 polygenicity in genome-wide association studies. *Nat Genet* **47**, 291-295,  
1644 doi:10.1038/ng.3211  
1645 <http://www.nature.com/ng/journal/v47/n3/abs/ng.3211.html#supplementary-information>  
1646 (2015).
- 1647 57 Yang, J., Lee, S. H., Goddard, M. E. & Visscher, P. M. GCTA: a tool for genome-wide  
1648 complex trait analysis. *American journal of human genetics* **88**, 76-82,  
1649 doi:10.1016/j.ajhg.2010.11.011 (2011).
- 1650 58 Giambartolomei, C. *et al.* Bayesian test for colocalisation between pairs of genetic  
1651 association studies using summary statistics. *PLoS Genet* **10**, e1004383,  
1652 doi:10.1371/journal.pgen.1004383 (2014).
- 1653 59 Ihaka, R., Gentleman R. R: a language for data analysis and graphics. *Journal of*  
1654 *Computational and Graphical Statistics* **5**, 299-314 (1996).
- 1655 60 Gusev, A. *et al.* Integrative approaches for large-scale transcriptome-wide  
1656 association studies. *Nat Genet* **48**, 245-252, doi:10.1038/ng.3506 (2016).
- 1657 61 Willer, C. J., Li, Y. & Abecasis, G. R. METAL: fast and efficient meta-analysis of  
1658 genomewide association scans. *Bioinformatics (Oxford, England)* **26**, 2190-2191,  
1659 doi:10.1093/bioinformatics/btq340 (2010).
- 1660 62 Mardia, K. V. *Multivariate analysis / K.V. Mardia, J.T. Kent, J.M. Bibby.* (Academic  
1661 Press, 1979).
- 1662 63 Segre, A. V., Groop, L., Mootha, V. K., Daly, M. J. & Altshuler, D. Common inherited  
1663 variation in mitochondrial genes is not enriched for associations with type 2 diabetes  
1664 or related glycemic traits. *PLoS Genet* **6**, doi:10.1371/journal.pgen.1001058 (2010).
- 1665 64 Frayling, T. M. *et al.* A Common Allele in FGF21 Associated with Sugar Intake Is  
1666 Associated with Body Shape, Lower Total Body-Fat Percentage, and Higher Blood  
1667 Pressure. *Cell reports* **23**, 327-336, doi:10.1016/j.celrep.2018.03.070 (2018).

- 1668 65 Zheng, J. *et al.* LD Hub: a centralized database and web interface to perform LD score  
1669 regression that maximizes the potential of summary level GWAS data for SNP  
1670 heritability and genetic correlation analysis. *Bioinformatics (Oxford, England)*,  
1671 doi:10.1093/bioinformatics/btw613 (2016).
- 1672 66 Prokopenko, I. *et al.* A central role for GRB10 in regulation of islet function in man.  
1673 *PLoS Genet* **10**, e1004235, doi:10.1371/journal.pgen.1004235 (2014).
- 1674 67 Burgess, S., Scott, R. A., Timpson, N. J., Davey Smith, G. & Thompson, S. G. Using  
1675 published data in Mendelian randomization: a blueprint for efficient identification of  
1676 causal risk factors. *European journal of epidemiology* **30**, 543-552,  
1677 doi:10.1007/s10654-015-0011-z (2015).
- 1678 68 Bowden, J., Davey Smith, G. & Burgess, S. Mendelian randomization with invalid  
1679 instruments: effect estimation and bias detection through Egger regression.  
1680 *International journal of epidemiology* **44**, 512-525, doi:10.1093/ije/dyv080 (2015).
- 1681 69 Bowden, J., Davey Smith, G., Haycock, P. C. & Burgess, S. Consistent Estimation in  
1682 Mendelian Randomization with Some Invalid Instruments Using a Weighted Median  
1683 Estimator. *Genetic epidemiology* **40**, 304-314, doi:10.1002/gepi.21965 (2016).
- 1684 70 Delaneau, O., Zagury, J. F. & Marchini, J. Improved whole-chromosome phasing for  
1685 disease and population genetic studies. *Nature methods* **10**, 5-6,  
1686 doi:10.1038/nmeth.2307 (2013).
- 1687 71 Manichaikul, A. *et al.* Robust relationship inference in genome-wide association  
1688 studies. *Bioinformatics (Oxford, England)* **26**, 2867-2873,  
1689 doi:10.1093/bioinformatics/btq559 (2010).
- 1690  
1691  
1692  
1693

## Acknowledgements:

Full acknowledgements and supporting grant details can be found in the Supplementary material.

## Author contributions:

**Central analysis and writing team:** N.M.W., R.N.B., M.H., F.R.D., K.K.O., M.I.M., J.R.P., D.M.E., R.M.F.

**Statistical analysis:** N.M.W., R.N.B., M.H., F.R.D., Ø.H., C.Laurin, J.B., S.P., K.H., B.F., A.R.W., A.Mahajan, J.T., N.R.R., N.W.R., Z.Q., G-H.Ø.M., M.Vaudel, M.N., T.M.S., M.H.Z., J.P.B., N.G., M.N.K., R.L-G., F.G., T.S.A., L.P., R.R., V.H., J-J.H., L-P.L., A.C., S.M., D.L.C., Y.W., E.T., C.A.W., C.T.H., N.V-T., P.K.J., J.N.P., I.N., R.M., N.P., E.M.v.L., R.J., V.L., R.C.R., A.E., S.J.B., W.A., J.A.M., K.L.L., C.A., G.Z., L.J.M., J.Heikkinen, A.H.v.K., K.J.G., N.R.v.Z., C.M-G., Z.K., S.D., H.M., E.V.R.A., M.Murcia, S.B-G., D.M.H., J.M.Mercader, K.E.S., P.A.L., S.E.M., B.M.S., J-F.C., K.Panoutsopoulou, F.S., D.T., I.P., M.A.T., H.Y., K.S.R., S.E.J., P-R.L., A.Murray, M.N.W., E.Z., G.V.D., Y-Y.T., M.G.H., K.L.M., J.F.F., D.M.S., N.J.T., A.P.M., D.A.L., J.R.P., D.M.E., R.M.F.

**Genotyping:** F.R.D., Ø.H., T.M.S., M.H.Z., N.G., R.L-G., L.P., J-J.H., L-P.L., J.W.H., X.E., L.M., L.B., C.S.M., C.Langenberg, J'a.L., R.A.S., J.H.Z., G.H., S.M.R., A.J.B., J.F-T., C.M-G., H.G.d.H., F.R.R., Z.K., P.M-V., H.M., E.V.R.A., M.Bustamante, M.A., P.K., M.Stumvoll, T.A.L., C.M.v.D., A.K., E.Z., S-M.S., G.W.M., H.C., J.F.W., T.G.V., C.E.P., E.E.W., T.D.S., T.L., P.V., H.B., K.B., J.C.M., F.R., J.F.F., T.H., O.P., A.G.U., M-R.J., W.L.L.Jr, G.D.S., N.J.T., N.J.W., H.H., S.F.G., T.M.F., D.A.L., P.R.N., K.K.O., M.I.M., J.R.P., D.M.E., R.M.F.

**Sample collection and phenotyping:** F.R.D., B.F., C.J.M., J.C., J.P.B., M.N.K., R.L-G., F.G., R.R., I.N., H.M.I., J.W.H., L.S-M., C.R., B.H., M.Kogevinas, L.C., M-F.H., C.S.M., F.D.M., C.Langenberg, J'a.L., R.A.S., J.H.Z., S.M.R., C.M-G., H.G.d.H., Z.K., P.M-V., S.D., G.W., M.M-N., M.Standl, C.E.F., C.T., C.E.v.B., M.Bustamante, D.M.H., A.L., B.A.K., M.Bartels, J.S., R.K.V., S.M.W., B.L.C., A.T., K.F.M., A-M.E., T.A.L., A.K., H.N., K.Pahkala, O.T.R., B.J., G.V.D., S-M.S., G.W.M., J.F.W., T.G.V., M.Vrijheid, J-C.H., L.J.B., C.E.P., L.S.A., J.B.B., J.G.E., E.E.W., A.T.H., T.D.S., M.Kähönen, J.S.V., T.L., P.V., H.B., K.B., M.Melbye, E.A.N., D.O.M-K., J.F.F., V.W.J., C.Pisinger, A.A.V., M-R.J., C.Power, E.H., W.L.L.Jr, G.D.S., N.J.W., H.H., S.F.G., D.A.L., K.K.O., M.I.M., J.R.P.

**Study Design and Principal Investigators:** J.P.B., I.N., H.M.I., L.S-M., X.E., B.H., J.M.Murabito, M.Kogevinas, L.C., M-F.H., F.D.M., M.A., A.T., M.Stumvoll, K.F.M., A-M.E., T.A.L., C.M.v.D., W.K., A.K., H.N., K.Pahkala, O.T.R., B.J., G.V.D., Y-Y.T., S-M.S., G.W.M., H.C., J.F.W., T.G.V., M.Vrijheid, E.J.d.G., H.N.K., J-C.H., L.J.B., C.E.P., J.Heinrich, L.S.A., J.B.B., K.L.M., J.G.E., E.E.W., A.T.H., T.D.S., M.Kähönen, J.S.V., T.L., D.I.B., S.S., P.V., H.B., K.B., J.C.M., M.Melbye, E.A.N., D.O.M-K., F.R., J.F.F., V.W.J., T.H., C.Pisinger, A.A.V., O.P., A.G.U., M-R.J., C.Power, E.H., W.L.L.Jr, N.J.T., A.P.M., N.J.W., H.H., S.F.G., T.M.F., D.A.L., P.R.N., S.J., K.K.O., M.I.M., J.R.P., R.M.F.

## Competing interests statement

A.A.V. is an employee of AstraZeneca. D.A.L. has received support from Medtronic LTD and Roche Diagnostics for biomarker research that is not related to the study presented in this paper. M.I.M. serves on advisory panels for Pfizer, NovoNordisk, Zoe Global; has received honoraria from Merck, Pfizer, NovoNordisk and Eli Lilly; has stock options in Zoe Global; has received research funding from Abbvie, Astra Zeneca, Boehringer Ingelheim, Eli Lilly, Janssen, Merck, NovoNordisk, Pfizer, Roche, Sanofi Aventis, Servier, Takeda.
